**Title:** Predictors and risk factors of short-term and long-term outcomes among women with gestational diabetes mellitus (GDM) and their offspring: Moving toward precision prognosis?

**Authors:** Zhila Semnani-Azad<sup>1</sup>, Romy Gaillard<sup>2</sup>, Alice E Hughes<sup>3</sup>, Kristen E. Boyle<sup>4</sup>, Deirdre K. Tobias<sup>1,5</sup>, Wei Perng<sup>6</sup>, as part of ADA/EASD PMDI

<sup>1</sup> Department of Nutrition, Harvard T.H. Chan School of Public Health, Boston, MA, USA

<sup>2</sup> Department of Pediatrics, Erasmus Medical Center, Rotterdam, Netherlands

<sup>3</sup> Faculty of Health and Life Sciences, University of Exeter Medical School, Exeter, United Kingdom

<sup>4</sup> Department of Pediatrics and the Lifecourse Epidemiology of Adiposity and Diabetes (LEAD) Center, University of Colorado Anschutz Medical Campus, Aurora, CO, USA

<sup>5</sup> Department of Medicine, Brigham and Women's Hospital, Harvard Medical School, Boston, MA, USA

<sup>6</sup> Department of Epidemiology and the Lifecourse Epidemiology of Adiposity and Diabetes (LEAD) Center, University of Colorado Anschutz Medical Campus, Aurora, CO, USA

**Correspondence:**

Zhila Semnani-Azad, PhD

Department of Nutrition, Harvard School of Public Health, 655 Huntington Avenue, Boston, MA 02115. **T:** (617) 495-1000. **E-mail:** [zsemnaniazad@hsph.harvard.edu](mailto:zsemnaniazad@hsph.harvard.edu)

**Abbreviations:** BMI – body mass index; CRP – C-reactive protein; CVD – cardiovascular disease; GDM – gestational diabetes mellitus; MetS – metabolic syndrome; n.s. - not significant; SES – socioeconomic status; T2D – type 2 diabetes

**Funding:**

*Zhila Semnani-Azad* is funded by Canadian Institutes of Health Research (CIHR) Fellowship.

*Romy Gaillard* is funded by the Dutch Diabetes Foundation (grant number 2017.81.002), the Netherlands Organization for Health Research and Development (NWO, ZonMw, grant number 543003109; NWO, ZonMw VIDI 09150172110034) and from the European Union's Horizon 2020 research and innovation programme under the ERA-NET Cofund action (no 727565), EndObesity, ZonMW the Netherlands (no. 529051026).

*Alice Hughes* is funded the Wellcome Trust GW4-Clinical Academic PhD Fellowship [WT203918].

*Kristen Boyle* is funded by R01DK117168.

*Deirdre K. Tobias* is funded by ADA-1-19-JDF-115.

*Wei Perng* is funded by American Diabetes Association (ADA)-7-22-ICTSPM-08 and National Institutes of Health (NIH) U01 DK134981.

**Conflict of interest/disclosure statement:** The funders played no role in the design, methodology, or interpretation of results of this work.

1 **ABSTRACT**

2           As part of the American Diabetes Association Precision Medicine in Diabetes Initiative  
3 (PMDI) – a partnership with the European Association for the Study of Diabetes (EASD) – this  
4 systematic review is part of a comprehensive evidence evaluation in support of the 2<sup>nd</sup>  
5 International Consensus Report on Precision Diabetes Medicine. Here, we sought to synthesize  
6 evidence from empirical research papers published through September 1<sup>st</sup>, 2021 to evaluate and  
7 identify prognostic conditions, risk factors, and biomarkers among women and children affected  
8 by gestational diabetes mellitus (GDM), focusing on clinical endpoints of cardiovascular disease  
9 (CVD) and type 2 diabetes (T2D) among women with a history of GDM; and adiposity and  
10 cardiometabolic profile among offspring exposed to GDM *in utero*. We identified a total of 107  
11 observational studies and 12 randomized controlled trials testing the effect of pharmaceutical  
12 and/or lifestyle interventions. Broadly, current literature indicates that greater GDM severity,  
13 higher maternal body mass index, belonging to racial/ethnic minority group; and unhealthy  
14 lifestyle behaviors would predict a woman’s risk of incident T2D and CVD, and an unfavorable  
15 cardiometabolic profile among offspring. However, the level of evidence is low (Level 4  
16 according to the Diabetes Canada 2018 Clinical Practice Guidelines for diabetes prognosis)  
17 largely because most studies leveraged retrospective data from large registries that are vulnerable  
18 to residual confounding and reverse causation bias; and prospective cohort studies that may  
19 suffer selection and attrition bias. Moreover, for the offspring outcomes, we identified a  
20 relatively small body of literature on prognostic factors indicative of future adiposity and  
21 cardiometabolic risk. Future high-quality prospective cohort studies in diverse populations with  
22 granular data collection on prognostic factors, clinical and subclinical outcomes, high fidelity of  
23 follow-up, and appropriate analytical approaches to deal with structural biases are warranted.

## 24 1. INTRODUCTION

25 Gestational diabetes mellitus (GDM) is the most common metabolic disorder of  
26 pregnancy, affecting 6-12% of pregnancies globally <sup>1,2</sup>. A diagnosis of GDM indicates a state of  
27 maternal hyperglycemia due to insufficient insulin secretion and/or insulin resistance that is  
28 associated not only with risk of acute pregnancy complications, but also carries implications for  
29 the long-term health of the mother and offspring. For instance, in women, GDM is associated  
30 with up to 70% higher cumulative incidence of type 2 diabetes (T2D) following the index  
31 pregnancy <sup>3</sup> and two-fold greater risk of cardiovascular disease (CVD) than gravidas without  
32 GDM <sup>4</sup>. Additionally, offspring exposed to GDM *in utero* have higher adiposity and a worse  
33 metabolic profile than their unexposed counterparts <sup>5</sup>. The wide-ranging and intergenerational  
34 sequelae of GDM-affected pregnancies emphasize the importance of characterizing not only the  
35 short- and long-term consequences of this common pregnancy complication, but also, early  
36 bellwethers of such consequences to facilitate preventive intervention of such comorbidities and  
37 complications – a concept known as disease *prognosis*.

38 Recent technological advancements have improved the capacity to comprehensively  
39 assess physiology. In turn, these developments facilitated the ability to harness metabolic  
40 heterogeneity – the phenomenon of interest to precision medicine <sup>6</sup>, by which similar exposures  
41 and risk factors yield differential health sequelae across individuals. In the context of GDM  
42 prognosis, this effort requires the identification of prognostic conditions and biomarkers among  
43 women with a history of GDM and/or their children who were exposed to GDM *in utero* that  
44 may serve as both causal and non-causal indicators of future health risks.

45 Recognizing the relevance of metabolic heterogeneity in accurate and precise assessment  
46 of metabolic disease prediction, diagnosis, treatment, and prognosis, the *Precision Medicine in*

47 *Diabetes Initiative* (PMDI) was established in 2018 by the American Diabetes Association  
48 (ADA) in partnership with the European Association for the Study of Diabetes (EASD). The  
49 ADA/EASD PMDI includes global thought leaders in precision diabetes medicine who are  
50 working to address the burgeoning need for better diabetes prevention and care through precision  
51 medicine <sup>7</sup>. This Systematic Review is written on behalf of the ADA/EASD PMDI as part of a  
52 comprehensive evidence evaluation in support of the 2<sup>nd</sup> International Consensus Report on  
53 Precision Diabetes Medicine <sup>1</sup>.

54 Here, we synthesize evidence from empirical research papers published through  
55 September 1<sup>st</sup>, 2021 to evaluate and identify prognostic conditions, risk factors, and biomarkers  
56 among women and children affected by GDM pregnancies, focusing on clinical endpoints of  
57 CVD and T2D among women with a history of GDM; and adiposity and cardiometabolic profile  
58 among offspring exposed to GDM *in utero*.

## 59 2. METHODS

### 60 2.1. Systematic review protocol development

61 We developed a systematic review protocol to comprehensively include and evaluate  
62 individual research studies reporting on risk factors for long-term clinical outcomes in women  
63 with GDM and a range of cardiometabolic health and anthropometric outcomes in GDM-  
64 exposed offspring. Our strategy aimed to identify two broad categories of empirical studies: (1)  
65 populations of women with a history of prior GDM that investigated additional exposures or risk  
66 factors for incident postpartum T2D or CVD; (2) populations comprising offspring exposed to  
67 GDM *in utero*. Studies including pregnancies unaffected by GDM were eligible only if results  
68 among GDM subgroups were reported.

69 Prognostic factors of interest – hereafter also referred to as “exposures” – included  
70 sociodemographic and environmental factors, lifestyle and behavioral characteristics, traditional  
71 clinical traits, and novel ‘omics biomarkers. We considered these prognostic factors during the  
72 perinatal/postpartum periods and across the lifecourse for both the mothers and offspring.  
73 Maternal outcomes of interest were incident T2D or CVD, including study-specific composites  
74 of clinical cardiovascular events, non-fatal and fatal myocardial infarction or stroke, and chronic  
75 kidney disease (CKD). For offspring, we were interested in outcomes reported 12 weeks of age  
76 and older, and limited to anthropometrics, glycemic and cardiometabolic traits or biomarkers,  
77 and incident metabolic syndrome (MetS), T2D, or CVD.

### 78 2.2. Data sources, search strategy, and screening criteria

79 We published our search strategy and systematic review protocol to PROSPERO  
80 CRD42021276094<sup>8</sup>. We developed search terms for Medline EMBASE, and Cochrane  
81 CENTRAL (**Supplemental Table 1**) for eligible citations published in English language from

82 January 1<sup>st</sup>, 1990 through September 30<sup>th</sup>, 2021. References of accepted manuscripts and relevant  
83 systematic reviews published within the past 2 years were screened to identify additional  
84 citations. We included prospective and retrospective observational studies identifying factors  
85 with incident outcomes of interest in women or offspring exposed to GDM. We excluded cross-  
86 sectional analyses among populations with prevalent disease outcomes or traits. While studies  
87 could include non-GDM exposed pregnancies, those without subgroup findings exclusively  
88 among GDM pregnancies were excluded. We also included interventions prospectively  
89 comparing effects of a treatment assignment on the outcome. Exclusion criteria comprised  
90 studies with outcomes <12 weeks postpartum, maternal studies reporting only intermediate  
91 phenotypes, glycemic traits, or cardiometabolic biomarkers, and studies in offspring that only  
92 assessed endpoints outside of the cardiometabolic outcomes of interest (e.g., neurodevelopment,  
93 allergic disease). Using these, two independent reviewers conducted screening at the title abstract  
94 level. For accepted citations, two independent reviewers implemented screening of the full  
95 manuscripts. Conflicts at all screening stages were resolved by a third reviewer. All screening  
96 was conducted in the Covidence online systematic review tracking platform.

### 97 **2.3. Data extraction and synthesis of results**

98 We developed and piloted a data extraction template for eligible manuscripts. Data  
99 included manuscript information, study level details and design, population enrollment and  
100 characteristics, exposure and outcome ascertainment and diagnosis criteria, follow-up time of  
101 outcome assessment since index GDM pregnancy and other pertinent details. We indicated the  
102 population in which outcomes were assessed (e.g., maternal, offspring, or both), and recorded the  
103 exposures that were investigated in four broad categories: (i) social/environmental/genetics

104 factors across the life course; (ii) all factors in perinatal/postpartum window; (iii) long-term  
105 maternal exposures; and (iv) long-term offspring exposures.

#### 106 **2.4. Quality assessment (risk of bias) and synthesis**

107 We assessed the quality of each study using the Joanna Briggs Institute's (JBI) critical  
108 appraisal tools for cohort studies and randomized controlled trials (RCTs) <sup>9</sup>. For cohort studies,  
109 we assessed quality based on 11 items which evaluated population recruitment, exposure and  
110 outcome ascertainment, confounding, statistical methodology, and follow-up. For the RCTs, the  
111 JBI criteria evaluated 13 items which assessed selection and allocation, intervention,  
112 administration, outcome ascertainment, follow-up, and statistical analysis. Each JBI item was  
113 categorized as 'Yes', 'No', 'Unclear' or 'Not applicable' following the described guidelines.  
114 Any uncertainty in assessment was further discussed by the full research team.

#### 115 **2.5. Overall evidence certainty assessment and synthesis**

116 The certainty of evidence was determined using the Diabetes Canada 2018 Clinical  
117 Practice Guidelines for studies <sup>10</sup>. Levels were based on study design and criteria focused on  
118 inception cohort of patients presenting GDM but without outcomes of interest,  
119 inclusion/exclusion reproducibility, follow-up of at least 80% of participants, adjustment for  
120 confounding factors, and reproducible outcome measures. Scoring ranged from level 1 to 4, with  
121 Level 1 indicating the highest certainty of evidence and Level 4 indicating the lowest certainty of  
122 evidence. Details on the criteria and guidelines are presented in **Supplemental Table 2**.

## 123 3. RESULTS

124 **Figure 1** displays results of the systematic search and article inclusion process. Of the  
125 8,141 studies identified, five were excluded due to duplication. Another 7,770 were excluded  
126 following title and abstract review. The remaining 341 studies were reviewed in full. A total of  
127 119 studies met the inclusion criteria for this review.

128 **Table 1** outlines the summary of studies included in this systematic review. Of the 119  
129 studies identified, 107 were observational studies and 12 were RCTs. Of the observational  
130 studies, 57 studies<sup>2-55</sup> reported on maternal outcomes and 51 studies<sup>56-106</sup> reported on offspring  
131 outcomes. Of the RCTs, three evaluated maternal outcomes<sup>107-109</sup> and nine assessed offspring  
132 outcomes<sup>61,91,110-116</sup>. Studies included data from primarily from Caucasian ethnicities with  
133 publications mainly from North American (n = 25) and European (n = 39) countries. The sample  
134 sizes of the eligible studies ranged from 26 to 23 302.

135

### 136 3.1. Maternal outcomes

#### 137 3.1.1. Maternal type 2 diabetes

138 Fifty-one observational studies<sup>11-61</sup> (**Table 2**) and three RCTs<sup>62-64</sup> (**Table 3**) assessed  
139 socio-demographic, lifestyle, clinical and pregnancy characteristics associated with the risk of  
140 T2D among GDM women. The most commonly-studied characteristics were maternal BMI and  
141 GDM severity. Twenty-four observational studies showed that a higher BMI, measured prior to  
142 pregnancy, pregnancy or during the lifecourse was associated with a higher risk of T2D. Two  
143 observational studies further showed that a higher weight gain in the postpartum period also  
144 increased the risk of T2D. Fifteen studies assessed the role of GDM severity on the risk of  
145 developing T2D and showed that more severe GDM, measured by either clinical markers or need



146 for insulin, was associated with a higher risk of developing T2D (**Table 2**). One study was a  
147 RCT; all other studies were observational. Fewer studies explored the role of lifestyle/behavioral,  
148 pregnancy, and clinical characteristics. Six studies explored the role of race/ethnicity in risk of  
149 T2D, two of which showed no significant associations (**Table 2**). Four studies suggested that the  
150 risk was higher among women with non-European ancestry. With regards to pregnancy  
151 characteristics, findings were inconsistent with three of six observational studies reporting an  
152 association of a complicated pregnancy with higher risk of T2D. The pregnancy complications  
153 assessed varied across reports. Six studies explored the role of parity, of which three showed  
154 that higher parity was associated with a higher risk of T2D. Four observational studies showed  
155 that breastfeeding was associated with reduced risk of developing T2D in later life. Three  
156 studies including one RCT focused on various healthy dietary patterns and the risk of T2D  
157 among GDM women but showed inconsistent results. Seven small studies used novel clinical  
158 biomarkers, including metabolomics, lipidomics, and diabetes auto-antibodies, and found  
159 positive associations with T2D.

### 160 **3.1.2. Maternal cardiovascular diseases**

161 Six observational studies <sup>11,31,65-68</sup> (**Table 4**) explored the role of sociodemographic,  
162 lifestyle, and pregnancy characteristics in future risk of CVD among women with GDM. Three  
163 studies <sup>11,66,67</sup> identified maternal BMI, before or during pregnancy, as a determinant of CVD risk,  
164 in which overweight and obese women with GDM have a higher risk of future CVD as compared  
165 to normal weight women with GDM. A study further showed that a healthy lifestyle – i.e.,  
166 healthy diet, physical activity and non-smoking - was associated with a lower risk of CVD  
167 among women with GDM <sup>66</sup>. Two studies showed that pregnancy complications, including

168 gestational hypertension<sup>68</sup> and stillbirth<sup>31</sup>, predicted risk of CVD among women of GDM. No  
169 significant effect modification was found by family history or chronic hypertension.

### 170 **3.1.3. Quality of studies conducted and certainty of evidence in maternal populations**

171 The quality of studies reviewed herein for prognostic factors indicative of risk of T2D or CVD is  
172 low and the overall certainty of evidence ranked between Levels 3 and 4 according to the  
173 Diabetes Canada 2018 Clinical Practice Guidelines<sup>10</sup>. Most current literature were based on  
174 retrospective studies leveraging registry data and observational cohort studies, both of which are  
175 vulnerable to bias and an inability to attribute causation to prognostic factors due to residual  
176 confounding, reverse causation bias by pre-existing conditions, and other characteristics around  
177 time of pregnancy and GDM diagnoses.

## 178 **3.2. Offspring outcomes**

### 179 **3.2.1. Anthropometry and body composition**

180 In comparison to the relatively large maternal literature, fewer studies have focused on  
181 prognostic factors associated with suboptimal offspring body composition among those exposed  
182 to GDM *in utero*. Forty-three observational studies<sup>56-98</sup> (**Table 5**) and four RCTs<sup>110,113,115,116</sup>  
183 (**Table 6**) examined associations of sociodemographic, lifestyle, clinical and pregnancy  
184 characteristics associated with anthropometric outcomes offspring of GDM women. The most  
185 commonly-studied characteristics were maternal BMI, GDM severity, breastfeeding status, and  
186 birthweight, and were compared to anthropometric outcomes, specifically BMI and risk of  
187 overweight. Five observational studies showed that a higher maternal pre-pregnancy BMI was  
188 associated with an adverse body composition in the offspring, reflected by a higher BMI, waist  
189 circumference, or body fat mass, and a higher risk of overweight or obesity. Twelve studies  
190 assessed the associations of maternal GDM severity, measured by either clinical markers or need

191 for insulin, with offspring body composition. Most of eight observational studies, only three  
192 indicated that more severe maternal GDM is associated with a higher offspring BMI and  
193 overweight risk. All four identified RCTs evaluated GDM severity and overall showed no  
194 significant association with offspring anthropometry or body composition. Four observational  
195 studies showed that a higher size at birth is associated with higher BMI and risk of overweight in  
196 GDM offspring, but four studies reported no significant associations. Two studies showed that  
197 offspring that a higher size at birth but with exposure to breastfeeding were associated with  
198 lower offspring BMI and reduced risk of overweight or obesity. With regards to breastfeeding  
199 status, only observational studies showed that exclusive breastfeeding and a longer duration of  
200 breastfeeding were associated with a lower offspring BMI and lower risk of overweight or  
201 obesity. Only four small studies used novel clinical biomarkers, including metabolomics in cord  
202 blood and gene expression in muscle and adipose tissue and showed variable associations with  
203 body composition. Furthermore, four independent studies using data from the Danish National  
204 Birth Cohort indicated that maternal diet consisting of fatty fish <sup>77</sup>, refined grain <sup>98</sup>, and sugar-  
205 sweetened beverage intake <sup>97</sup> were associated with higher offspring BMI, while protein intake  
206 did not show significant impact on offspring abdominal fat <sup>76</sup>.

### 207 **3.2.2. Cardiometabolic profile**

208 Only a few studies explored risk factors for adverse cardiometabolic outcomes in GDM  
209 offspring. These studies focused on blood pressure, lipids, and glycemic markers in the offspring  
210 separately or on metabolic syndrome like phenotypes, integrating several of these components  
211 and offspring anthropometric measures. Fourteen observational studies <sup>69-87</sup>11 (**Table 7**) and  
212 seven RCTs <sup>82-88</sup> (**Table 8**) were identified. Four observational studies assessed associations of  
213 different maternal dietary components including macronutrients or specific micronutrients, and

214 showed no consistent associations with offspring cardiometabolic outcomes. Several RCTs  
215 compared diet vs insulin treatment of GDM and showed no significant associations with the  
216 development of a metabolic syndrome like phenotype in the offspring. One RCT evaluating a  
217 lifestyle intervention including exercise and diet counselling for treatment of GDM compared to  
218 clinical care showed a higher risk of unfavorable metabolic outcomes in the offspring in the  
219 intervention group. One observational study showed that breastfeeding was associated with a  
220 lower risk of metabolic syndrome like phenotype in the offspring of GDM women, but one  
221 observational study showed no consistent effects. Birthweight was the most commonly-studied  
222 predictor of the offspring exposures. Two observational studies showed that a higher birthweight  
223 in offspring of GDM women was associated with a higher risk of metabolic syndrome like  
224 phenotype in offspring, whereas one study showed no association.

### 225 **3.2.3. Quality of studies and certainty of evidence conducted in offspring populations**

226 At the individual study level, we identified low quality of evidence for prognostic factors  
227 indicative of future adiposity and cardiometabolic risk among offspring exposed to GDM *in*  
228 *utero*. As with the maternal literature, most studies focusing on offspring outcomes were based  
229 on retrospective study designs leveraging registry data and observational cohort studies, both of  
230 which can be fraught with residual confounding and reverse causation bias, as well as structural  
231 biases like selection and attrition bias. Moreover, the literature of offspring outcomes remains  
232 relatively scant and with potentially inadequate durations of follow-up for manifestation of  
233 clinically-relevant cardiometabolic outcomes, though additional research is warranted.  
234 Furthermore, the certainty of evidence for maternal and offspring exposures with  
235 cardiometabolic outcomes were scored Level 4 based on the Diabetes Canada guidelines,<sup>10</sup>

236 based several factors including limited studies, small sample sizes, heterogeneity of study  
237 designs, and inadequate statistical methods.

## 238 **4. DISCUSSION**

### 239 **4.1. Summary**

240 This systematic review sought to identify prognostic risk factors during the perinatal  
241 period and across the lifecourse for maternal and offspring cardiovascular and metabolic  
242 outcomes among women and children affected by GDM pregnancies. We hypothesized that  
243 worse glycemic control at the time of GDM diagnosis (i.e., severity of GDM), older maternal  
244 age, belonging to racial/ethnic minority group; and unfavorable lifestyle behaviors would predict  
245 risk of full-blown type 2 diabetes (T2D) and cardiovascular disease (CVD) among women, and  
246 an unfavorable cardiometabolic profile among offspring.

247 The studies identified were primarily long-term retrospective and prospective studies.  
248 The level of evidence for prognostic risk factors of maternal T2D and CVD and for offspring  
249 cardiometabolic risk is low – i.e., Level 4 according to the Diabetes Canada 2018 Clinical  
250 Practice Guidelines for diabetes prognosis<sup>10</sup> – largely due to unmeasured confounding by  
251 lifestyle behaviors, the possibility of reverse causation bias due to pre-existing chronic  
252 conditions prior to or at the time of GDM diagnosis, and for offspring outcomes, the small body  
253 of literature on prognostic factors indicative of future adiposity and cardiometabolic risk. In the  
254 sections below, we synthesize general findings and comment further on quality of studies.

### 255 **4.2. Maternal outcomes**

#### 256 **4.2.1. Cardiovascular disease**

257 In line with a large literature demonstrating that women with a history of GDM are at  
258 higher risk CVD than their non-diabetic counterparts<sup>89,90</sup>, studies among women with a history  
259 of GDM indicated dose-response associations of GDM severity with these endpoints.  
260 Additionally, maternal pre-pregnancy or early pregnancy BMI was the most assessed prognostic

261 factor linked to future CVD risk. Additionally, prenatal smoking, stillbirth, and gestational  
262 hypertension were each associated with risk for CVD in women with a history of GDM, whereas  
263 chronic hypertension and family history of CVD were not. Given the paucity of available  
264 research on CVD risk in women with a history of GDM, and the low certainty of evidence  
265 assessment, this is a research area ripe for investigation.

#### 266 **4.2.2. Type 2 diabetes**

267         Among women with GDM, higher BMI at any time in relation to the index pregnancy –  
268 i.e., pre-pregnancy, during the index pregnancy including gestational weight gain, and lifecourse  
269 measures of weight – predicted higher risk of T2D later in life. GDM severity, typically  
270 estimated by use of insulin or higher blood glucose values during the index pregnancy, was  
271 consistently associated with higher risk of developing T2D. While few studies assessed race  
272 and/or ethnicity as a prognostic risk factor, women of Asian or non-European descent with a  
273 history of GDM had higher risk of future T2D than White women<sup>24,30,50</sup>. Breastfeeding duration  
274 and/or exclusivity was consistently associated with lower risk T2D risk following a GDM  
275 diagnosis during pregnancy, though follow-up often ended <2 years postpartum – a timeframe  
276 within which occult T2D incidence is relatively low. Longer duration follow-up is necessary to  
277 better evaluate the benefits of breastfeeding on T2D risk. Other lifestyle factors of interest  
278 included physical activity level during the perinatal and postpartum periods, as well as  
279 compliance with a healthy diet (e.g., adherence to a Mediterranean or DASH-like dietary pattern;  
280 the Healthy Eating Index score). However, observational findings with respect to these variables  
281 were mixed and RCTs investigating the effects of dietary interventions yielded mixed results  
282 <sup>62,64</sup>.

283 Several studies have examined biomarkers associated with increased risk for T2D  
284 following GDM pregnancies, including glycemic control at the time of GDM diagnosis, lipids<sup>28</sup>,  
285 inflammatory biomarkers<sup>28</sup>, and novel biomarkers lipidomics<sup>23</sup> and metabolomics<sup>47</sup>  
286 biomarkers. While these findings align with the literature in other pregnant<sup>91</sup> and non-pregnant  
287 populations<sup>92</sup>, the low certainty of evidence from the studies and lack of replication/validation of  
288 findings prevent us from drawing firm conclusions regarding which factors may be the best  
289 predictors of future diabetes.

#### 290 **4.2.3. Quality of maternal studies**

291 We ranked the quality of evidence for prognostic factors indicative of risk of T2D or  
292 CVD in women as Level 4 (low)<sup>10</sup>. Most empirical literature comes predominantly from large  
293 health care registries that boast large sample sizes and decades of follow-up. However, they carry  
294 high risk of bias in terms of identifying and interpretation specific prognostic characteristics as  
295 causal risk factors due to residual confounding due to maternal lifestyle, pre-existing chronic  
296 conditions, and other characteristics around time of pregnancy and GDM diagnoses. For  
297 example, maternal hypertension status in pregnancy as a causal risk factor for T2D or CVD  
298 could be explained in part by maternal BMI, diet quality, physical activity, smoking status,  
299 socioeconomic factors, and more. In contrast, there are notable large prospective cohorts,  
300 including the CARDIA study and the Nurses' Health Study II, which collected detailed  
301 prospective information on the above-mentioned variables.

### 302 **4.3. Offspring outcomes**

#### 303 **4.3.1. Anthropometry and body composition**

304 The most common measure of offspring anthropometry was BMI between 2 and 10 years  
305 after birth. In alignment with maternal outcomes, GDM severity and higher maternal pre-



306 pregnancy BMI were associated with higher offspring adiposity, as indicated by  
307 overweight/obesity status. Yet, interpretation of these findings should be tempered those of  
308 intervention studies showing that GDM treatment did not affect offspring anthropometrics<sup>82,85,93</sup>.  
309 Similarly, RCTs testing the effects of pharmaceutical treatments (Metformin, insulin) and  
310 lifestyle interventions<sup>83</sup> to prevent GDM<sup>94,95</sup>. Other frequently studied perinatal predictors of  
311 offspring adiposity included birth size and breastfeeding duration/exclusivity. Generally, higher  
312 birthweight tended to be positively correlated with offspring BMI, though this association may  
313 be explained by the correlation between maternal and offspring BMI<sup>94</sup>. Some observational  
314 studies showed a protective effect of breastfeeding on offspring childhood obesity risk, though  
315 this finding was not consistent and we did not identify any RCTs to support this finding. While a  
316 few studies reported a modifying effect of offspring sex on future body composition (e.g.,<sup>96-98</sup>),  
317 the direction of association was not consistent.

#### 318 **4.3.2. Cardiometabolic profile**

319 Most studies that assessed offspring cardiometabolic profile were observational and  
320 focused on prognostic factors that occurred during the perinatal/postpartum period, though we  
321 identified a few RCTs that targeted maternal glycemic control during pregnancy via  
322 pharmaceutical treatments and/or lifestyle alterations.

323 Among observational studies, the most common prognostic factor was GDM severity  
324<sup>86,99-101</sup> at times assessed in conjunction with maternal BMI<sup>100</sup>. Although the magnitude of  
325 effects for GDM severity ranged across populations, greater severity was associated with worse  
326 glycemic control and an unfavorable cardiovascular profile in offspring. In addition to traditional  
327 biomarkers, one study identified hypothalamic activation as a determinant of BMI gain within  
328 the next year – a phenomenon that may mediate and/or modify the effect of GDM exposure *in*

329 *utero*<sup>102</sup>. As with the studies discussed above with respect to offspring anthropometry and body  
330 composition, RCTs to prevent GDM among high-risk women generally found minimal effects of  
331 the pharmaceutical and/or lifestyle interventions on offspring cardiometabolic profile, again  
332 suggesting that additional research is needed to better understand the pathophysiology of  
333 maternal GDM, to characterize relevant *in utero* programming pathways, and perhaps identify  
334 more specific and relevant offspring outcomes<sup>5</sup>.

### 335 **4.3.3. Quality of offspring studies**

336 As with the maternal studies, we categorized the literature on prognostic factors for  
337 offspring outcomes as being of low quality (Level 4). The inconsistent observational findings in  
338 conjunction with null results of RCTs targeting prevention of GDM among high-risk women  
339 indicate the existence of residual confounding for observational studies, and in the cases of the  
340 trials, the possibility that the interventions were developed with a suboptimal endpoint.  
341 Specifically, many prenatal interventions among women at high risk of GDM were developed  
342 with the goal of preventing macrosomia, which is a relatively crude indicator of developmental  
343 overnutrition and offspring adiposity. Future work is needed to gain a better understanding of *in*  
344 *utero* programming mechanisms that may link maternal GDM to offspring adiposity, as well as  
345 *de novo* interventions formulated to prevent neonatal adiposity assessed via gold standard  
346 methods such as air displacement plethysmography or dual X-ray absorptiometry<sup>5</sup>.

## 347 **5. STRENGTHS AND LIMITATIONS**

### 348 **5.1. Strengths and limitations of studies included in the systematic review**

349 A key strength of many studies included in this systematic review is the prospective study  
350 design, which enhances temporal and causal inference regarding prognostic capacity of the  
351 maternal and offspring characteristics and behaviors assessed in studies herein. Additional

352 strengths of some, but not all studies, include multi-ethnic study populations, which enhance  
353 generalizability of findings; large sample sizes, which improves capacity to detect biologically  
354 relevant associations; and use of gold standard assessments of the maternal and offspring  
355 outcomes of interest.

356 Limitations include the low-grade quality of studies included in this review (residual  
357 confounding, reverse causation bias, attrition and selection bias, inadequate duration of follow-  
358 up). Additionally, most studies were not designed to explore the long-term prognosis of GDM.  
359 Accordingly, many studies comprise *post hoc* analyses that were likely underpowered to detect  
360 smaller but biologically relevant effects of prognostic risk factors solely among mothers and/or  
361 offspring exposed to GDM. *Nota bene*, when screening studies, we noted that a general  
362 limitation of the literature on GDM prognostics in relation to offspring outcomes is assessment  
363 of the prognostic variable(s) contemporaneously with outcome assessment. These shortcomings  
364 resulted in high risk of bias and low quality of studies reviewed herein.

## 365 **5.2. Strengths and limitations of systematic review approach and methodology**

366 Strengths of the methodology for this systematic review include implementation of at  
367 least two independent reviews across all phases of the extraction and assessment process, with an  
368 additional review by a third independent reviewer to resolve conflicts; and adherence to well-  
369 established assessments of research quality and assessments of bias. Limitations include the  
370 exclusively qualitative synthesis of results – a necessity given the relatively small number of  
371 studies identified; and as with all systematic reviews, the potential for our conclusions to be  
372 impacted by publication bias.

## 373 **6. FUTURE DIRECTIONS**

374           Given the low quality of evidence identified in this systematic review, there is need for  
375 prospective cohort studies in diverse populations with granular data collection on prognostic risk  
376 factors as well as clinical and subclinical outcomes; high fidelity of follow-up across the  
377 lifecourse but, in particular, during sensitive windows of development during which there is  
378 greater developmental plasticity to respond to external cues <sup>103</sup>; consideration of appropriate  
379 adjustment covariates depending on the specific prognostic risk factor of interest (e.g., there is  
380 discourse regarding whether maternal pre-pregnancy BMI should be included as a covariate in  
381 models where GDM severity is the prognostic risk factors of interest given that these two  
382 variables likely share overlapping *in utero* programming pathways <sup>117,118</sup>); and appropriate causal  
383 inference <sup>104</sup> and analytical approaches <sup>105</sup> to address structural biases that afflict observational  
384 study designs.

385           As interest in the application of precision prognostics to improve health for women and  
386 children affected by GDM pregnancies grows, there remains a need to establish a foundational  
387 knowledge base regarding traditional prognostic factors which, in turn, will enhance our ability  
388 to identify novel prognostic biomarkers that improve risk stratification for unfavorable health  
389 outcomes among mother-offspring dyads affected by GDM.

390 **ACKNOWLEDGEMENTS**

391 The ADA/EASD Precision Diabetes Medicine Initiative, within which this work was conducted,  
392 has received the following support: The Covidence license was funded by Lund University  
393 (Sweden) for which technical support was provided by Maria Björklund and Krister Aronsson  
394 (Faculty of Medicine Library, Lund University, Sweden). Administrative support was provided  
395 by Lund University (Malmö, Sweden), University of Chicago (IL, USA), and the American  
396 Diabetes Association (Washington D.C., USA). The Novo Nordisk Foundation (Hellerup,  
397 Denmark) provided grant support for in-person writing group meetings (PI: L Phillipson,  
398 University of Chicago, IL). We also thank Marie-France Hivert for her valuable insights and  
399 feedback on this work.

400

401 **REFERENCES**

- 402 1. Nolan JJ, Kahkoska AR, Semnani-Azad Z, et al. ADA/EASD Precision Medicine in  
403 Diabetes Initiative: An International Perspective and Future Vision for Precision  
404 Medicine in Diabetes. *Diabetes care*. 2022;45(2):261-266.
- 405 2. Gunderson EP, Lewis CE, Lin Y, et al. Lactation Duration and Progression to Diabetes in  
406 Women Across the Childbearing Years: The 30-Year CARDIA Study. *JAMA internal  
407 medicine*. 2018;178(3):328-337.
- 408 3. Vince K, Poljičanin T, Brkić M, Rodin U, Matijević R. Prevalence of diabetes five years  
409 after having gestational diabetes during pregnancy - Croatian national study. *Primary  
410 care diabetes*. 2018;12(4):325-330.
- 411 4. Varner MW, Rice MM, Landon MB, et al. Pregnancies After the Diagnosis of Mild  
412 Gestational Diabetes Mellitus and Risk of Cardiometabolic Disorders. *Obstetrics and  
413 gynecology*. 2017;129(2):273-280.
- 414 5. Li W, Leng J, Liu H, et al. Nomograms for incident risk of post-partum type 2 diabetes in  
415 Chinese women with prior gestational diabetes mellitus. *Clinical endocrinology*.  
416 2019;90(3):417-424.
- 417 6. Liu H, Zhang C, Zhang S, et al. Prepregnancy body mass index and weight change on  
418 postpartum diabetes risk among gestational diabetes women. *Obesity (Silver Spring, Md)*.  
419 2014;22(6):1560-1567.
- 420 7. Li W, Zhang S, Liu H, et al. Different associations of diabetes with  $\beta$ -cell dysfunction and  
421 insulin resistance among obese and nonobese Chinese women with prior gestational  
422 diabetes mellitus. *Diabetes care*. 2014;37(9):2533-2539.

- 423 8. Steinhart JR, Sugarman JR, Connell FA. Gestational diabetes is a herald of NIDDM in  
424 Navajo women. High rate of abnormal glucose tolerance after GDM. *Diabetes care*.  
425 1997;20(6):943-947.
- 426 9. Hakkarainen H, Huopio H, Cederberg H, Voutilainen R, Heinonen S. Delivery of an LGA  
427 infant and the maternal risk of diabetes: A prospective cohort study. *Primary care*  
428 *diabetes*. 2018;12(4):364-370.
- 429 10. Wang Y, Chen L, Horswell R, et al. Racial differences in the association between  
430 gestational diabetes mellitus and risk of type 2 diabetes. *Journal of women's health*  
431 (2002). 2012;21(6):628-633.
- 432 11. Chodick G, Elchalal U, Sella T, et al. The risk of overt diabetes mellitus among women  
433 with gestational diabetes: a population-based study. *Diabetic medicine : a journal of the*  
434 *British Diabetic Association*. 2010;27(7):779-785.
- 435 12. Lappas M, Mundra PA, Wong G, et al. The prediction of type 2 diabetes in women with  
436 previous gestational diabetes mellitus using lipidomics. *Diabetologia*. 2015;58(7):1436-  
437 1442.
- 438 13. Lee AJ, Hiscock RJ, Wein P, Walker SP, Permezel M. Gestational diabetes mellitus:  
439 clinical predictors and long-term risk of developing type 2 diabetes: a retrospective  
440 cohort study using survival analysis. *Diabetes care*. 2007;30(4):878-883.
- 441 14. Retnakaran R, Shah BR. Fetal Sex and the Natural History of Maternal Risk of Diabetes  
442 During and After Pregnancy. *The Journal of clinical endocrinology and metabolism*.  
443 2015;100(7):2574-2580.

- 444 15. Kawasaki M, Arata N, Sakamoto N, et al. Risk factors during the early postpartum period  
445 for type 2 diabetes mellitus in women with gestational diabetes. *Endocrine journal*.  
446 2020;67(4):427-437.
- 447 16. Lin PC, Hung CH, Huang RD, Chan TF. Predictors of type 2 diabetes among Taiwanese  
448 women with prior gestational diabetes mellitus. *Japan journal of nursing science : JJNS*.  
449 2016;13(1):3-9.
- 450 17. Rivero K, Portal VL, Vieira M, Behle I. Prevalence of the impaired glucose metabolism  
451 and its association with risk factors for coronary artery disease in women with gestational  
452 diabetes. *Diabetes research and clinical practice*. 2008;79(3):433-437.
- 453 18. Akinci B, Celtik A, Genc S, et al. Evaluation of postpartum carbohydrate intolerance and  
454 cardiovascular risk factors in women with gestational diabetes. *Gynecological  
455 endocrinology : the official journal of the International Society of Gynecological  
456 Endocrinology*. 2011;27(5):361-367.
- 457 19. Myers JE, Hasan X, Maresh MJ. Post-natal assessment of gestational diabetes: fasting  
458 glucose or full glucose tolerance test? *Diabetic medicine : a journal of the British  
459 Diabetic Association*. 2014;31(9):1133-1137.
- 460 20. Pintaudi B, Lucisano G, Pellegrini F, et al. The long-term effects of stillbirth on women  
461 with and without gestational diabetes: a population-based cohort study. *Diabetologia*.  
462 2015;58(1):67-74.
- 463 21. Eades CE, Styles M, Leese GP, Cheyne H, Evans JM. Progression from gestational  
464 diabetes to type 2 diabetes in one region of Scotland: an observational follow-up study.  
465 *BMC pregnancy and childbirth*. 2015;15:11.



- 466 22. Kugishima Y, Yasuhi I, Yamashita H, et al. Risk factors associated with the development  
467 of postpartum diabetes in Japanese women with gestational diabetes. *BMC pregnancy  
468 and childbirth*. 2018;18(1):19.
- 469 23. Tseng CH. Parental diabetes in Taiwanese diabetic women with and without previous  
470 gestational diabetes. *European journal of clinical investigation*. 2008;38(8):555-561.
- 471 24. Bao W, Yeung E, Tobias DK, et al. Long-term risk of type 2 diabetes mellitus in relation  
472 to BMI and weight change among women with a history of gestational diabetes mellitus:  
473 a prospective cohort study. *Diabetologia*. 2015;58(6):1212-1219.
- 474 25. Pirkola J, Pouta A, Bloigu A, et al. Prepregnancy overweight and gestational diabetes as  
475 determinants of subsequent diabetes and hypertension after 20-year follow-up. *The  
476 Journal of clinical endocrinology and metabolism*. 2010;95(2):772-778.
- 477 26. Ley SH, Chavarro JE, Li M, et al. Lactation Duration and Long-term Risk for Incident  
478 Type 2 Diabetes in Women With a History of Gestational Diabetes Mellitus. *Diabetes  
479 care*. 2020;43(4):793-798.
- 480 27. Tobias DK, Hu FB, Chavarro J, Rosner B, Mozaffarian D, Zhang C. Healthful dietary  
481 patterns and type 2 diabetes mellitus risk among women with a history of gestational  
482 diabetes mellitus. *Archives of internal medicine*. 2012;172(20):1566-1572.
- 483 28. Tobias DK, Clish C, Mora S, et al. Dietary Intakes and Circulating Concentrations of  
484 Branched-Chain Amino Acids in Relation to Incident Type 2 Diabetes Risk Among High-  
485 Risk Women with a History of Gestational Diabetes Mellitus. *Clinical chemistry*.  
486 2018;64(8):1203-1210.

- 487 29. Bao W, Tobias DK, Bowers K, et al. Physical activity and sedentary behaviors associated  
488 with risk of progression from gestational diabetes mellitus to type 2 diabetes mellitus: a  
489 prospective cohort study. *JAMA internal medicine*. 2014;174(7):1047-1055.
- 490 30. Bao W, Li S, Chavarro JE, et al. Low Carbohydrate-Diet Scores and Long-term Risk of  
491 Type 2 Diabetes Among Women With a History of Gestational Diabetes Mellitus: A  
492 Prospective Cohort Study. *Diabetes care*. 2016;39(1):43-49.
- 493 31. Huvinen E, Eriksson JG, Koivusalo SB, et al. Heterogeneity of gestational diabetes  
494 (GDM) and long-term risk of diabetes and metabolic syndrome: findings from the  
495 RADIEL study follow-up. *Acta diabetologica*. 2018;55(5):493-501.
- 496 32. Lauenborg J, Hansen T, Jensen DM, et al. Increasing incidence of diabetes after  
497 gestational diabetes: a long-term follow-up in a Danish population. *Diabetes care*.  
498 2004;27(5):1194-1199.
- 499 33. Schaefer-Graf UM, Klavehn S, Hartmann R, et al. How do we reduce the number of  
500 cases of missed postpartum diabetes in women with recent gestational diabetes mellitus?  
501 *Diabetes care*. 2009;32(11):1960-1964.
- 502 34. Linné Y, Barkeling B, Rössner S. Natural course of gestational diabetes mellitus: long  
503 term follow up of women in the SPAWN study. *BJOG : an international journal of*  
504 *obstetrics and gynaecology*. 2002;109(11):1227-1231.
- 505 35. Gunderson EP, Hurston SR, Ning X, et al. Lactation and Progression to Type 2 Diabetes  
506 Mellitus After Gestational Diabetes Mellitus: A Prospective Cohort Study. *Annals of*  
507 *internal medicine*. 2015;163(12):889-898.

- 508 36. Lai M, Liu Y, Ronnett GV, et al. Amino acid and lipid metabolism in post-gestational  
509 diabetes and progression to type 2 diabetes: A metabolic profiling study. *PLoS medicine*.  
510 2020;17(5):e1003112.
- 511 37. Wahlberg J, Ekman B, Nyström L, Hanson U, Persson B, Arnqvist HJ. Gestational  
512 diabetes: Glycaemic predictors for fetal macrosomia and maternal risk of future diabetes.  
513 *Diabetes research and clinical practice*. 2016;114:99-105.
- 514 38. Löbner K, Knopff A, Baumgarten A, et al. Predictors of postpartum diabetes in women  
515 with gestational diabetes mellitus. *Diabetes*. 2006;55(3):792-797.
- 516 39. Daly B, Toulis KA, Thomas N, et al. Increased risk of ischemic heart disease,  
517 hypertension, and type 2 diabetes in women with previous gestational diabetes mellitus, a  
518 target group in general practice for preventive interventions: A population-based cohort  
519 study. *PLoS medicine*. 2018;15(1):e1002488.
- 520 40. Tam WH, Ma RC, Yang X, et al. Cardiometabolic risk in Chinese women with prior  
521 gestational diabetes: a 15-year follow-up study. *Gynecologic and obstetric investigation*.  
522 2012;73(2):168-176.
- 523 41. Fan Y, Li W, Liu H, et al. Effects of obesity and a history of gestational diabetes on the  
524 risk of postpartum diabetes and hyperglycemia in Chinese women: Obesity, GDM and  
525 diabetes risk. *Diabetes research and clinical practice*. 2019;156:107828.
- 526 42. Shen Y, Leng J, Li W, et al. Lactation intensity and duration to postpartum diabetes and  
527 prediabetes risk in women with gestational diabetes. *Diabetes/metabolism research and*  
528 *reviews*. 2019;35(3):e3115.

- 529 43. Wang L, Liu H, Zhang S, et al. Obesity index and the risk of diabetes among Chinese  
530 women with prior gestational diabetes. *Diabetic medicine : a journal of the British*  
531 *Diabetic Association*. 2014;31(11):1368-1377.
- 532 44. Yin P, Shao P, Liu H, et al. C-peptide levels and the risk of diabetes and pre-diabetes  
533 among Chinese women with gestational diabetes. *Journal of diabetes and its*  
534 *complications*. 2017;31(12):1658-1662.
- 535 45. Yuan X, Liu H, Wang L, et al. Gestational hypertension and chronic hypertension on the  
536 risk of diabetes among gestational diabetes women. *Journal of diabetes and its*  
537 *complications*. 2016;30(7):1269-1274.
- 538 46. Göbl CS, Bozkurt L, Yarragudi R, et al. Biomarkers of endothelial dysfunction in relation  
539 to impaired carbohydrate metabolism following pregnancy with gestational diabetes  
540 mellitus. *Cardiovascular diabetology*. 2014;13:138.
- 541 47. Yefet E, Schwartz N, Sliman B, Ishay A, Nachum Z. Good glycemic control of  
542 gestational diabetes mellitus is associated with the attenuation of future maternal  
543 cardiovascular risk: a retrospective cohort study. *Cardiovascular diabetology*.  
544 2019;18(1):75.
- 545 48. Weerasiri T, Riley SF, Sheedy MT, Walstab JE, Wein P. Amniotic fluid insulin values in  
546 women with gestational diabetes as a predictor of emerging diabetes mellitus. *The*  
547 *Australian & New Zealand journal of obstetrics & gynaecology*. 1993;33(4):358-361.
- 548 49. Hanson U, Persson B, Hartling SG, Binder C. Increased molar proinsulin-to-insulin ratio  
549 in women with previous gestational diabetes does not predict later impairment of glucose  
550 tolerance. *Diabetes care*. 1996;19(1):17-20.

- 551 50. Pallardo F, Herranz L, Garcia-Ingelmo T, et al. Early postpartum metabolic assessment in  
552 women with prior gestational diabetes. *Diabetes care*. 1999;22(7):1053-1058.
- 553 51. Dehmer EW, Phadnis MA, Gunderson EP, et al. Association Between Gestational  
554 Diabetes and Incident Maternal CKD: The Coronary Artery Risk Development in Young  
555 Adults (CARDIA) Study. *American journal of kidney diseases : the official journal of the  
556 National Kidney Foundation*. 2018;71(1):112-122.
- 557 52. Tobias DK, Stuart JJ, Li S, et al. Association of History of Gestational Diabetes With  
558 Long-term Cardiovascular Disease Risk in a Large Prospective Cohort of US Women.  
559 *JAMA internal medicine*. 2017;177(12):1735-1742.
- 560 53. Fadl H, Magnuson A, Östlund I, Montgomery S, Hanson U, Schwarcz E. Gestational  
561 diabetes mellitus and later cardiovascular disease: a Swedish population based case-  
562 control study. *BJOG : an international journal of obstetrics and gynaecology*.  
563 2014;121(12):1530-1536.
- 564 54. Kaul P, Savu A, Nerenberg KA, et al. Impact of gestational diabetes mellitus and high  
565 maternal weight on the development of diabetes, hypertension and cardiovascular  
566 disease: a population-level analysis. *Diabetic medicine : a journal of the British Diabetic  
567 Association*. 2015;32(2):164-173.
- 568 55. Pace R, Brazeau AS, Meltzer S, Rahme E, Dasgupta K. Conjoint Associations of  
569 Gestational Diabetes and Hypertension With Diabetes, Hypertension, and Cardiovascular  
570 Disease in Parents: A Retrospective Cohort Study. *American journal of epidemiology*.  
571 2017;186(10):1115-1124.

- 572 56. Aris IM, Soh SE, Tint MT, et al. Associations of infant milk feed type on early postnatal  
573 growth of offspring exposed and unexposed to gestational diabetes in utero. *European*  
574 *journal of nutrition*. 2017;56(1):55-64.
- 575 57. Boerschmann H, Pflüger M, Henneberger L, Ziegler AG, Hummel S. Prevalence and  
576 predictors of overweight and insulin resistance in offspring of mothers with gestational  
577 diabetes mellitus. *Diabetes care*. 2010;33(8):1845-1849.
- 578 58. Chen YL, Han LL, Shi XL, et al. Adverse pregnancy outcomes on the risk of overweight  
579 offspring: a population-based retrospective study in Xiamen, China. *Scientific reports*.  
580 2020;10(1):1549.
- 581 59. Crume TL, Ogden LG, Mayer-Davis EJ, et al. The impact of neonatal breast-feeding on  
582 growth trajectories of youth exposed and unexposed to diabetes in utero: the EPOCH  
583 Study. *International journal of obesity (2005)*. 2012;36(4):529-534.
- 584 60. Dugas C, Kearney M, Mercier R, et al. Early life nutrition, glycemic and anthropometric  
585 profiles of children exposed to gestational diabetes mellitus in utero. *Early human*  
586 *development*. 2018;118:37-41.
- 587 61. Egeland GM, Meltzer SJ. Following in mother's footsteps? Mother-daughter risks for  
588 insulin resistance and cardiovascular disease 15 years after gestational diabetes. *Diabetic*  
589 *medicine : a journal of the British Diabetic Association*. 2010;27(3):257-265.
- 590 62. Faith MS, Hittner JB, Hurston SR, et al. Association of Infant Temperament With  
591 Subsequent Obesity in Young Children of Mothers With Gestational Diabetes Mellitus.  
592 *JAMA pediatrics*. 2019;173(5):424-433.
- 593 63. Gillman MW, Rifas-Shiman S, Berkey CS, Field AE, Colditz GA. Maternal gestational  
594 diabetes, birth weight, and adolescent obesity. *Pediatrics*. 2003;111(3):e221-226.

- 595 64. Gunderson EP, Greenspan LC, Faith MS, Hurston SR, Quesenberry CP, Jr. Breastfeeding  
596 and growth during infancy among offspring of mothers with gestational diabetes mellitus:  
597 a prospective cohort study. *Pediatric obesity*. 2018;13(8):492-504.
- 598 65. Hammoud NM, de Valk HW, Biesma DH, Visser GH. Intrauterine Adiposity and BMI in  
599 4- to 5-Year-Old Offspring from Diabetic Pregnancies. *Neonatology*. 2017;111(2):177-  
600 181.
- 601 66. Hammoud NM, Visser GHA, van Rossem L, Biesma DH, Wit JM, de Valk HW. Long-  
602 term BMI and growth profiles in offspring of women with gestational diabetes.  
603 *Diabetologia*. 2018;61(5):1037-1045.
- 604 67. Huang Y, Zhang W, Go K, et al. Altered growth trajectory in children born to mothers  
605 with gestational diabetes mellitus and preeclampsia. *Archives of gynecology and*  
606 *obstetrics*. 2020;301(1):151-159.
- 607 68. Hui LL, Li AM, Nelson EAS, Leung GM, Lee SL, Schooling CM. In utero exposure to  
608 gestational diabetes and adiposity: does breastfeeding make a difference? *International*  
609 *journal of obesity (2005)*. 2018;42(7):1317-1325.
- 610 69. Ijäs H, Vääräsmäki M, Saarela T, Keravuo R, Raudaskoski T. A follow-up of a  
611 randomised study of metformin and insulin in gestational diabetes mellitus: growth and  
612 development of the children at the age of 18 months. *BJOG : an international journal of*  
613 *obstetrics and gynaecology*. 2015;122(7):994-1000.
- 614 70. Kaul P, Bowker SL, Savu A, Yeung RO, Donovan LE, Ryan EA. Association between  
615 maternal diabetes, being large for gestational age and breast-feeding on being overweight  
616 or obese in childhood. *Diabetologia*. 2019;62(2):249-258.

- 617 71. Kelstrup L, Hjort L, Houshmand-Oeregaard A, et al. Gene Expression and DNA  
618 Methylation of PPARGC1A in Muscle and Adipose Tissue From Adult Offspring of  
619 Women With Diabetes in Pregnancy. *Diabetes*. 2016;65(10):2900-2910.
- 620 72. Kubo A, Ferrara A, Windham GC, et al. Maternal hyperglycemia during pregnancy  
621 predicts adiposity of the offspring. *Diabetes care*. 2014;37(11):2996-3002.
- 622 73. Landi SN, Radke S, Engel SM, et al. Association of Long-term Child Growth and  
623 Developmental Outcomes With Metformin vs Insulin Treatment for Gestational Diabetes.  
624 *JAMA pediatrics*. 2019;173(2):160-168.
- 625 74. Leng J, Li W, Zhang S, et al. GDM Women's Pre-Pregnancy Overweight/Obesity and  
626 Gestational Weight Gain on Offspring Overweight Status. *PloS one*.  
627 2015;10(6):e0129536.
- 628 75. Liang Z, Liu H, Wang L, et al. Maternal Gestational Diabetes Mellitus Modifies the  
629 Relationship Between Genetically Determined Body Mass Index During Pregnancy and  
630 Childhood Obesity. *Mayo Clinic proceedings*. 2020;95(9):1877-1887.
- 631 76. Maslova E, Hansen S, Grunnet LG, et al. Maternal protein intake in pregnancy and  
632 offspring metabolic health at age 9-16 y: results from a Danish cohort of gestational  
633 diabetes mellitus pregnancies and controls. *The American journal of clinical nutrition*.  
634 2017;106(2):623-636.
- 635 77. Maslova E, Hansen S, Strøm M, et al. Fish Intake in Pregnancy and Offspring Metabolic  
636 Parameters at Age 9-16-Does Gestational Diabetes Modify the Risk? *Nutrients*.  
637 2018;10(10).
- 638 78. Maslova E, Hansen S, Grunnet LG, et al. Maternal glycemic index and glycemic load in  
639 pregnancy and offspring metabolic health in childhood and adolescence-a cohort study of



- 640 68,471 mother-offspring dyads from the Danish National Birth Cohort. *European journal*  
641 *of clinical nutrition*. 2019;73(7):1049-1062.
- 642 79. Nouhjah S, Shahbazian H, Latifi SM, Malamiri RA, Ghodrati N. Body mass index  
643 growth trajectories from birth through 24 months in Iranian infants of mothers with  
644 gestational diabetes mellitus. *Diabetes & metabolic syndrome*. 2019;13(1):408-412.
- 645 80. Pirkola J, Pouta A, Bloigu A, et al. Risks of overweight and abdominal obesity at age 16  
646 years associated with prenatal exposures to maternal prepregnancy overweight and  
647 gestational diabetes mellitus. *Diabetes care*. 2010;33(5):1115-1121.
- 648 81. Schaefer-Graf UM, Pawliczak J, Passow D, et al. Birth weight and parental BMI predict  
649 overweight in children from mothers with gestational diabetes. *Diabetes care*.  
650 2005;28(7):1745-1750.
- 651 82. Schaefer-Graf UM, Hartmann R, Pawliczak J, et al. Association of breast-feeding and  
652 early childhood overweight in children from mothers with gestational diabetes mellitus.  
653 *Diabetes care*. 2006;29(5):1105-1107.
- 654 83. Shi X, Wang D, Lin M, et al. MATERNAL GESTATIONAL DIABETES MELLITUS  
655 AND OFFSPRING BODY MASS INDEX FROM 1 TO 4 YEARS. *Endocrine practice :  
656 official journal of the American College of Endocrinology and the American Association  
657 of Clinical Endocrinologists*. 2020;26(6):619-626.
- 658 84. Shearrer GE, Whaley SE, Miller SJ, House BT, Held T, Davis JN. Association of  
659 gestational diabetes and breastfeeding on obesity prevalence in predominately Hispanic  
660 low-income youth. *Pediatric obesity*. 2015;10(3):165-171.

- 661 85. Shokry E, Marchioro L, Uhl O, et al. Transgenerational cycle of obesity and diabetes:  
662 investigating possible metabolic precursors in cord blood from the PREOBE study. *Acta*  
663 *diabetologica*. 2019;56(9):1073-1082.
- 664 86. Shub A, Churilov L, Miranda M, Georgiou HM, Lappas M. Postpartum maternal  
665 adipokines and infant weight for length at 1 year in women with gestational diabetes. *The*  
666 *journal of maternal-fetal & neonatal medicine : the official journal of the European*  
667 *Association of Perinatal Medicine, the Federation of Asia and Oceania Perinatal*  
668 *Societies, the International Society of Perinatal Obstet*. 2019;32(9):1571-1574.
- 669 87. Song Q, Wang L, Liu H, et al. Maternal GDM Status, Genetically Determined Blood  
670 Glucose, and Offspring Obesity Risk: An Observational Study. *Obesity (Silver Spring,*  
671 *Md)*. 2021;29(1):204-212.
- 672 88. Vandyousefi S, Whaley SE, Widen EM, et al. Association of breastfeeding and early  
673 exposure to sugar-sweetened beverages with obesity prevalence in offspring born to  
674 mothers with and without gestational diabetes mellitus. *Pediatric obesity*.  
675 2019;14(12):e12569.
- 676 89. Vohr BR, McGarvey ST. Growth patterns of large-for-gestational-age and appropriate-  
677 for-gestational-age infants of gestational diabetic mothers and control mothers at age 1  
678 year. *Diabetes care*. 1997;20(7):1066-1072.
- 679 90. Vohr BR, McGarvey ST, Tucker R. Effects of maternal gestational diabetes on offspring  
680 adiposity at 4-7 years of age. *Diabetes care*. 1999;22(8):1284-1291.
- 681 91. Wroblewska-Seniuk K, Wender-Ozegowska E, Szczapa J. Long-term effects of diabetes  
682 during pregnancy on the offspring. *Pediatric diabetes*. 2009;10(7):432-440.

- 683 92. Zhang S, Liu H, Zhang C, et al. Maternal glucose during pregnancy and after delivery in  
684 women with gestational diabetes mellitus on overweight status of their children. *BioMed*  
685 *research international*. 2015;2015:543038.
- 686 93. Zhang S, Wang L, Leng J, et al. Hypertensive disorders of pregnancy in women with  
687 gestational diabetes mellitus on overweight status of their children. *Journal of human*  
688 *hypertension*. 2017;31(11):731-736.
- 689 94. Zhang T, Wang P, Liu H, et al. Physical Activity, TV Watching Time, Sleeping, and Risk  
690 of Obesity and Hyperglycemia in the Offspring of Mothers with Gestational Diabetes  
691 Mellitus. *Scientific reports*. 2017;7:41115.
- 692 95. Zhao YL, Ma RM, Lao TT, et al. Maternal gestational diabetes mellitus and overweight  
693 and obesity in offspring: a study in Chinese children. *Journal of developmental origins of*  
694 *health and disease*. 2015;6(6):479-484.
- 695 96. Zhu Y, Olsen SF, Mendola P, et al. Growth and obesity through the first 7 y of life in  
696 association with levels of maternal glycemia during pregnancy: a prospective cohort  
697 study. *The American journal of clinical nutrition*. 2016;103(3):794-800.
- 698 97. Zhu Y, Olsen SF, Mendola P, et al. Maternal consumption of artificially sweetened  
699 beverages during pregnancy, and offspring growth through 7 years of age: a prospective  
700 cohort study. *International journal of epidemiology*. 2017;46(5):1499-1508.
- 701 98. Zhu Y, Olsen SF, Mendola P, et al. Maternal dietary intakes of refined grains during  
702 pregnancy and growth through the first 7 y of life among children born to women with  
703 gestational diabetes. *The American journal of clinical nutrition*. 2017;106(1):96-104.

- 704 99. Kampmann FB, Thuesen ACB, Hjort L, et al. Exposure to Gestational Diabetes Is a  
705 Stronger Predictor of Dysmetabolic Traits in Children Than Size at Birth. *The Journal of*  
706 *clinical endocrinology and metabolism*. 2019;104(5):1766-1776.
- 707 100. Kampmann FB, Thuesen ACB, Hjort L, et al. Increased leptin, decreased adiponectin and  
708 FGF21 concentrations in adolescent offspring of women with gestational diabetes.  
709 *European journal of endocrinology*. 2019;181(6):691-700.
- 710 101. Vandyousefi S, Goran MI, Gunderson EP, et al. Association of breastfeeding and  
711 gestational diabetes mellitus with the prevalence of prediabetes and the metabolic  
712 syndrome in offspring of Hispanic mothers. *Pediatric obesity*. 2019;14(7):e12515.
- 713 102. Boney CM, Verma A, Tucker R, Vohr BR. Metabolic syndrome in childhood: association  
714 with birth weight, maternal obesity, and gestational diabetes mellitus. *Pediatrics*.  
715 2005;115(3):e290-296.
- 716 103. Borgoño CA, Hamilton JK, Ye C, et al. Determinants of insulin resistance in infants at  
717 age 1 year: impact of gestational diabetes mellitus. *Diabetes care*. 2012;35(8):1795-1797.
- 718 104. Del Gobbo LC, Song Y, Elin RJ, Meltzer SJ, Egeland GM. Gestational glucose  
719 intolerance modifies the association between magnesium and glycemic variables in  
720 mothers and daughters 15 years post-partum. *Magnesium research*. 2012;25(2):54-63.
- 721 105. Wilk M, Horodnicka-Józwa A, Moleda P, et al. Assessment of selected carbohydrate  
722 parameters in children exposed to gestational diabetes in utero. *Neuro endocrinology*  
723 *letters*. 2015;36(5):504-510.
- 724 106. Dugas C, Bélanger M, Perron J, et al. Is A Healthy Diet Associated with Lower  
725 Anthropometric and Glycemic Alterations in Predisposed Children Born from Mothers  
726 with Gestational Diabetes Mellitus? *Nutrients*. 2019;11(3).

- 727 107. Casey BM, Rice MM, Landon MB, et al. Effect of Treatment of Mild Gestational  
728 Diabetes on Long-Term Maternal Outcomes. *American journal of perinatology*.  
729 2020;37(5):475-482.
- 730 108. Huang F, Zhang S, Tian Y, et al. Effect of mobile health based peripartum management of  
731 gestational diabetes mellitus on postpartum diabetes: A randomized controlled trial.  
732 *Diabetes research and clinical practice*. 2021;175:108775.
- 733 109. Ratner RE, Christophi CA, Metzger BE, et al. Prevention of diabetes in women with a  
734 history of gestational diabetes: effects of metformin and lifestyle interventions. *The*  
735 *Journal of clinical endocrinology and metabolism*. 2008;93(12):4774-4779.
- 736 110. Landon MB, Rice MM, Varner MW, et al. Mild gestational diabetes mellitus and long-  
737 term child health. *Diabetes care*. 2015;38(3):445-452.
- 738 111. Grotenfelt NE, Wasenius N, Eriksson JG, et al. Effect of maternal lifestyle intervention  
739 on metabolic health and adiposity of offspring: Findings from the Finnish Gestational  
740 Diabetes Prevention Study (RADIEL). *Diabetes & metabolism*. 2020;46(1):46-53.
- 741 112. Keely EJ, Malcolm JC, Hadjiyannakis S, Gaboury I, Lough G, Lawson ML. Prevalence  
742 of metabolic markers of insulin resistance in offspring of gestational diabetes  
743 pregnancies. *Pediatric diabetes*. 2008;9(1):53-59.
- 744 113. Malcolm JC, Lawson ML, Gaboury I, Lough G, Keely E. Glucose tolerance of offspring  
745 of mother with gestational diabetes mellitus in a low-risk population. *Diabetic medicine :*  
746 *a journal of the British Diabetic Association*. 2006;23(5):565-570.
- 747 114. Battin MR, Obolonkin V, Rush E, Hague W, Coat S, Rowan J. Blood pressure  
748 measurement at two years in offspring of women randomized to a trial of metformin for  
749 GDM: follow up data from the MiG trial. *BMC pediatrics*. 2015;15:54.

- 750 115. Rowan JA, Rush EC, Obolonkin V, Battin M, Wouldes T, Hague WM. Metformin in  
751 gestational diabetes: the offspring follow-up (MiG TOFU): body composition at 2 years  
752 of age. *Diabetes care*. 2011;34(10):2279-2284.
- 753 116. Gillman MW, Oakey H, Baghurst PA, Volkmer RE, Robinson JS, Crowther CA. Effect of  
754 treatment of gestational diabetes mellitus on obesity in the next generation. *Diabetes*  
755 *care*. 2010;33(5):964-968.
- 756 117. Francis EC, Kechris K, Cohen CC, Michelotti G, Dabelea D, Perng W. Metabolomic  
757 Profiles in Childhood and Adolescence Are Associated with Fetal Overnutrition.  
758 *Metabolites*. 2022;12(3).
- 759 118. Perng W, Oken E, Dabelea D. Developmental overnutrition and obesity and type 2  
760 diabetes in offspring. *Diabetologia*. 2019;62(10):1779-1788.
- 761 119. Liu H, Zhang S, Wang L, et al. Fasting and 2-hour plasma glucose, and HbA1c in  
762 pregnancy and the postpartum risk of diabetes among Chinese women with gestational  
763 diabetes. *Diabetes research and clinical practice*. 2016;112:30-36.
- 764 120. Dornhorst A, Bailey PC, Anyaoku V, Elkeles RS, Johnston DG, Beard RW. Abnormalities  
765 of glucose tolerance following gestational diabetes. *The Quarterly journal of medicine*.  
766 1990;77(284):1219-1228.
- 767 121. Zhang C, Olsen SF, Hinkle SN, et al. Diabetes & Women's Health (DWH) Study: an  
768 observational study of long-term health consequences of gestational diabetes, their  
769 determinants and underlying mechanisms in the USA and Denmark. *BMJ open*.  
770 2019;9(4):e025517.

- 771 122. Vääräsmäki M, Pouta A, Elliot P, et al. Adolescent manifestations of metabolic syndrome  
772 among children born to women with gestational diabetes in a general-population birth  
773 cohort. *American journal of epidemiology*. 2009;169(10):1209-1215.  
774

**TABLE 1.** Summary of studies included in this systematic review, stratified by maternal, offspring, and maternal and offspring outcomes.

| Author Year                                                                                                                                                                                   | Country     | Study name or site<br>(Year of birth)                                                                                      | Exposure                                                                       | Maternal outcome(s) or<br>offspring outcome(s)                                                                                           | Method of GDM<br>ascertainment | Sample Size                     |
|-----------------------------------------------------------------------------------------------------------------------------------------------------------------------------------------------|-------------|----------------------------------------------------------------------------------------------------------------------------|--------------------------------------------------------------------------------|------------------------------------------------------------------------------------------------------------------------------------------|--------------------------------|---------------------------------|
| <b>MATERNAL OUTCOMES</b>                                                                                                                                                                      |             |                                                                                                                            |                                                                                |                                                                                                                                          |                                |                                 |
| <b>Ratner 2008</b> <sup>109</sup>                                                                                                                                                             | USA         | RCT, Diabetes Prevention Program (DPP)                                                                                     | Maternal life-course                                                           | T2D                                                                                                                                      | Self-report                    | 350                             |
| <b>Gillman 2010</b> <sup>116</sup>                                                                                                                                                            | Australia   | Australian Carbohydrate Intolerance Study in Pregnant Women (ACHOIS)                                                       | Perinatal/postpartum                                                           | Anthropometrics                                                                                                                          | Not specified                  | 199                             |
| <b>Ijäs 2015</b> <sup>69</sup>                                                                                                                                                                | Finland     | RCT (NCT01087866), Oulu University Hospital (2005-2007)                                                                    | Perinatal/postpartum                                                           | Anthropometrics                                                                                                                          | Not specified                  | 93                              |
| <b>Huvinen 2018</b> <sup>31</sup>                                                                                                                                                             | Finland     | Finnish Gestational Diabetes Prevention Study (RADIEL)                                                                     | Perinatal/postpartum                                                           | Maternal: T2D;<br>Offspring:<br>Anthropometrics;<br>Glycemic traits;<br>Cardiometabolic biomarkers                                       | Biochemical test               | Maternal: 179<br>Offspring: 127 |
| <b>Landon 2015</b> <sup>110</sup> ,<br><b>Vарner 2017</b> <sup>4</sup>                                                                                                                        | USA         | RCT, Eunice Kennedy Shriver National Institute of Child Health and Human Development Maternal-Fetal Medicine Units Network | Perinatal/postpartum                                                           | Maternal: T2D;<br>Offspring: T2D; CVD composite; Other: Metabolic syndrome; Anthropometrics; Glycemic traits; Cardiometabolic biomarkers | Biochemical test               | Maternal: 457<br>Offspring: 500 |
| <b>Battin 2015</b> <sup>114</sup> ,<br><b>Rowan 2011</b> <sup>115</sup>                                                                                                                       | New Zealand | Metformin in Gestational diabetes (MiG): the offspring follow-up (TOFU) ACTRN12605000311651)                               | Perinatal/postpartum                                                           | Anthropometrics;<br>Cardiometabolic biomarkers                                                                                           |                                |                                 |
| <b>Hanson 1996</b> <sup>49</sup>                                                                                                                                                              | Sweden      | RCT, Karolinska Hospital and St. Goran's Hospital (1981-1984)                                                              | Maternal life-course                                                           | T2D                                                                                                                                      | Not specified                  | 97                              |
| <b>Keely 2008</b> <sup>112</sup> ,<br><b>Malcolm 2006</b> <sup>113</sup>                                                                                                                      | Canada      | RCT, Ottawa Hospital Ontario (1991-1995)                                                                                   | Perinatal/postpartum;<br>Offspring life-course                                 | Glycemic traits;<br>Cardiometabolic biomarkers; Metabolomic syndrome; T2D                                                                |                                |                                 |
| <b>Liu 2014</b> <sup>6</sup> , <b>Fan 2019</b> <sup>41</sup> , <b>Li 2014</b> <sup>7</sup> , <b>Li 2019</b> <sup>5</sup> , <b>Liu 2016</b> <sup>119</sup> ,<br><b>Wang 2014</b> <sup>43</sup> | China       | Tianjin Gestational Diabetes Mellitus Prevention Program                                                                   | Social/environmental/genetic;<br>Perinatal/postpartum;<br>Maternal life-course | T2D                                                                                                                                      |                                |                                 |
| <b>Pallardo 1999</b> <sup>50</sup>                                                                                                                                                            | Spain       | University Hospital La Paz, Madrid (1987-1997)                                                                             | Social/environmental/genetic;<br>Perinatal/postpartum                          | T2D                                                                                                                                      | Biochemical test               | 788                             |
| <b>Myers 2014</b> <sup>19</sup>                                                                                                                                                               | UK          | St. Mary's Hospital, Manchester                                                                                            | Social/environmental/genetic                                                   | T2D                                                                                                                                      | Biochemical test               | 629                             |



|                                                                  |                 |                                                                                                                 |                                                                          |     |                                   |       |
|------------------------------------------------------------------|-----------------|-----------------------------------------------------------------------------------------------------------------|--------------------------------------------------------------------------|-----|-----------------------------------|-------|
|                                                                  |                 | (2003-2013)                                                                                                     |                                                                          |     |                                   |       |
| <b>Dornhorst 1990</b> <sup>120</sup>                             | UK              | St. Mary's Hospital, London (1976-1982)                                                                         | Social/environmental/genetic; Perinatal/postpartum                       | T2D | Medical records                   | 56    |
| <b>Linne 2002</b> <sup>34</sup>                                  | Sweden          | Stockholm Pregnancy and Women's Nutrition (SPAWN) study                                                         | Perinatal/postpartum; Maternal life-course                               | T2D | Medical records                   | 28    |
| <b>Vince 2018</b> <sup>3</sup>                                   | Croatia         | CroDiab National Registry                                                                                       | Perinatal/postpartum                                                     | T2D | Medical records                   | 853   |
| <b>Zhang 2019</b> <sup>121</sup> , <b>Ley 2020</b> <sup>26</sup> | Denmark and USA | Diabetes & Women's Health (DWH) Study                                                                           | Perinatal/postpartum                                                     | T2D | Self-report                       | 7759  |
| <b>Akinci 2011</b> <sup>18</sup>                                 | Turkey          | Dokuz Eylul University Hospital, Izmir (2002-2008)                                                              | Perinatal/postpartum                                                     | T2D | Biochemical test                  | 195   |
| <b>Yefet 2019</b> <sup>47</sup>                                  | Israel          | Emek Medical Center (1991-2011)                                                                                 | Perinatal/postpartum                                                     | T2D | Biochemical test                  | 446   |
| <b>Lobner 2006</b> <sup>38</sup>                                 | Germany         | German GDM Prospective Study, Births 1989-1999                                                                  | Social/environmental/genetic; Perinatal/postpartum; Maternal life-course | T2D | Biochemical test                  | 302   |
| <b>Retnakaran 2015</b> <sup>14</sup>                             | Canada          | Ontario births 200-2010                                                                                         | Perinatal/postpartum; Offspring life-course                              | T2D | Medical records                   | 23302 |
| <b>Steinhart 1997</b> <sup>8</sup>                               | USA             | Indian Health Service                                                                                           | Perinatal/postpartum                                                     | T2D | Medical records                   | 111   |
| <b>Lin 2016</b> <sup>16</sup>                                    | Taiwan          | Kaohsiung Medical University (2011)                                                                             | Social/environmental/genetic; Perinatal/postpartum                       | T2D | Medical records                   | 130   |
| <b>Hakkarainen 2018</b> <sup>9</sup>                             | Finland         | Kuopio University Hospital, Births 1989-2009                                                                    | Perinatal/postpartum                                                     | T2D | Medical records                   | 444   |
| <b>Wang 2012</b> <sup>10</sup>                                   | USA             | Louisiana State University Hospital                                                                             | Social/environmental/genetic; Perinatal/postpartum                       | T2D | Medical records                   | 1142  |
| <b>Chodick 2010</b> <sup>11</sup>                                | Israel          | Maccabi Healthcare Services (1995-2009)                                                                         | Perinatal/postpartum                                                     | T2D | Medical records; Biochemical test | 11270 |
| <b>Lappas 2015</b> <sup>12</sup>                                 | Australia       | Mercy Hospital for Women, Melbourne (2003-2005)                                                                 | Perinatal/postpartum; Maternal life-course                               | T2D | Biochemical test                  | 104   |
| <b>Lee 2007</b> <sup>13</sup>                                    | Australia       | Mercy Hospital for Women, Melbourne (1971-2003)                                                                 | Social/environmental/genetic; Perinatal/postpartum; Maternal life-course | T2D | Medical records                   | 5,470 |
| <b>Weerasiri 1993</b> <sup>48</sup>                              | Australia       | Mercy Hospital for Women, Melbourne (1985-1992)                                                                 | Perinatal/postpartum                                                     | T2D | Biochemical test                  | 216   |
| <b>Schaefer-Graf 2009</b> <sup>33</sup>                          | Germany         | Multi-Center (2000-2005)                                                                                        | Perinatal/postpartum                                                     | T2D | Medical records                   | 605   |
| <b>Kugishima 2018</b> <sup>22</sup>                              | Japan           | Nagasaki Medical Center (2003-2014)                                                                             | Social/environmental/genetic; Perinatal/postpartum                       | T2D | Biochemical test                  | 306   |
| <b>Kawasaki 2020</b> <sup>15</sup>                               | Japan           | National Center for Child Health and Development Tokyo, Osaka Women's and Children's Hospital, Nagasaki Medical | Social/environmental/genetic; Perinatal/postpartum                       | T2D | Medical records                   | 399   |

| Center (1995-2011)                                                                                                               |             |                                                           |                                                                           |                 |                  |       |
|----------------------------------------------------------------------------------------------------------------------------------|-------------|-----------------------------------------------------------|---------------------------------------------------------------------------|-----------------|------------------|-------|
| <b>Tseng 2008</b> <sup>23</sup>                                                                                                  | Taiwan      | National Health Insurance Database (NR)                   | Social/environmental/genetic                                              | T2D             | Self-report      | 510   |
| <b>Eades 2015</b> <sup>21</sup>                                                                                                  | Scotland    | Ninewells Hospital, Dundee (1994-2004)                    | Social/environmental/genetic; Perinatal/postpartum                        | T2D             | Medical records  | 164   |
| <b>Rivero 2008</b> <sup>17</sup>                                                                                                 | Brazil      | Pe. Jeremias' Hospital                                    | Perinatal/postpartum; Maternal life-course                                | T2D             | Biochemical test | 109   |
| <b>Fadl 2014</b> <sup>53</sup>                                                                                                   | Sweden      | Swedish Medical Birth Register (SMBR)                     | Perinatal/postpartum; Maternal life-course                                | T2D; CVD        | Biochemical test | 15949 |
| <b>Kaul 2015</b> <sup>54</sup>                                                                                                   | Canada      | Alberta Perinatal Health Program                          | Perinatal/postpartum                                                      | T2D; CVD        | Medical records  | 8731  |
| <b>Gunderson 2018</b> <sup>2</sup>                                                                                               | USA         | Coronary Artery Risk Development in Young Adults (CARDIA) | Social/environmental/genetic; Maternal life-course; Perinatal/Postpartum  | T2D, CKD        | Self-report      | 155   |
| <b>Pintaudi 2015</b> <sup>20</sup>                                                                                               | Italy       | National Health System Registry, Puglia (2002-2010)       | Perinatal/postpartum                                                      | T2D; CVD        | Medical records  | 3851  |
| <b>Bao 2014</b> <sup>29</sup> , <b>Bao 2015</b> <sup>24</sup> , <b>Bao 2016</b> <sup>30</sup> , <b>Tobias 2017</b> <sup>52</sup> | USA         | Nurses' Health Study II                                   | Perinatal/postpartum; Maternal life-course; Social/environmental/genetic; | T2D; CVD        | Self-report      | 5292  |
| <b>OFFSPRING OUTCOMES</b>                                                                                                        |             |                                                           |                                                                           |                 |                  |       |
| <b>Huang 2020</b> <sup>67</sup>                                                                                                  | USA         | Stress in Pregnancy Study (SIPS)                          | Perinatal/postpartum                                                      | Anthropometrics | Medical records  | 26    |
| <b>Hammoud 2017</b> <sup>65</sup>                                                                                                | Netherlands | University Medical Center Utrecht                         | Perinatal/postpartum                                                      | Anthropometrics | Medical records  | 104   |
| <b>Shearrer 2015</b> <sup>84</sup>                                                                                               | USA         | Women, Infants and Children Program, Los Angeles County   | Perinatal/postpartum; Offspring life-course                               | Anthropometrics | Self-report      | 470   |

|                                                                                      |                |                                                                                                              |                                                                                                         |                 |                                      |        |
|--------------------------------------------------------------------------------------|----------------|--------------------------------------------------------------------------------------------------------------|---------------------------------------------------------------------------------------------------------|-----------------|--------------------------------------|--------|
| <b>Chen 2020</b> <sup>58</sup>                                                       | China          | Xiamen Medical Birth Registry                                                                                | Social/environmental/genetic;<br>Perinatal/postpartum;<br>Offspring life-course<br>Perinatal/postpartum | Anthropometrics | Medical records                      | 6778   |
| <b>Shub 2019</b> <sup>86</sup>                                                       | Australia      | Mercy Hospital for Women,<br>Melbourne (NR)                                                                  | Perinatal/postpartum                                                                                    | Anthropometrics | Biochemical test                     | 160    |
| <b>Nouhjah 2019</b> <sup>79</sup>                                                    | Iran           | Ahvazin (2014-2016)                                                                                          | Perinatal/postpartum                                                                                    | Anthropometrics | Biochemical test                     | 438    |
| <b>Kaul 2019</b> <sup>70</sup>                                                       | Canada         | Calgary Region, Births 2005-<br>2013                                                                         | Perinatal/postpartum                                                                                    | Anthropometrics | Medical records                      | 5136   |
| <b>Hui 2018</b> <sup>68</sup>                                                        | China          | Children of 1997 Birth Cohort                                                                                | Perinatal/postpartum                                                                                    | Anthropometrics | Self-report                          | 539    |
| <b>Kubo 2014</b> <sup>72</sup>                                                       | USA            | Cohort Study of Young Girls'<br>Nutrition, Environment, and<br>Transitions (CYGNET)                          | Perinatal/postpartum                                                                                    | Anthropometrics | Medical records                      | 27     |
| <b>Schaefer-Graf 2005</b> <sup>81</sup> ,<br><b>Schaefer-Graf 2006</b> <sup>82</sup> | Germany        | Diabetes Prenatal Care Clinic of<br>the Department of Obstetrics at<br>the Vivantes Medical Center<br>Berlin | Social/environmental/genetic;<br>Perinatal/postpartum;<br>Offspring life-course                         | Anthropometrics | Medical records;<br>Biochemical test | 324    |
| <b>Zhao 2015</b> <sup>95</sup>                                                       | China          | First Affiliated Hospital of<br>Kunming Medical University,<br>Births 2003-2011                              | Perinatal/postpartum;<br>Offspring life-course                                                          | Anthropometrics | Biochemical test                     | 1068   |
| <b>Aris 2017</b> <sup>56</sup>                                                       | Singapore      | Growing Up in Singapore<br>Towards Healthy Outcomes<br>(GUSTO) Study                                         | Perinatal/postpartum;<br>Offspring life-course                                                          | Anthropometrics | Biochemical test                     | 181    |
| <b>Gillman 2003</b> <sup>63</sup>                                                    | USA            | Growing Up Today Study<br>(GUTS) and Nurses' Health<br>Study II                                              | Perinatal/postpartum                                                                                    | Anthropometrics | Self-report                          | 14,881 |
| <b>Landi 2019</b> <sup>73</sup>                                                      | New<br>Zealand | National Maternity Collection<br>(MAT)                                                                       | Perinatal/postpartum;<br>Offspring life-course                                                          | Anthropometrics | Medical records                      | 3,928  |

|                                                                                                                                                                                                                                                                                      |         |                                                        |                                                                                                          |                                                                                                                                                                        |                              |     |
|--------------------------------------------------------------------------------------------------------------------------------------------------------------------------------------------------------------------------------------------------------------------------------------|---------|--------------------------------------------------------|----------------------------------------------------------------------------------------------------------|------------------------------------------------------------------------------------------------------------------------------------------------------------------------|------------------------------|-----|
| <b>Crume 2012</b> <sup>59</sup>                                                                                                                                                                                                                                                      | USA     | Exploring Perinatal Outcomes among CHildren (EPOCH)    | Social/environmental/genetic<br>Perinatal/postpartum;<br>Offspring life-course                           | Anthropometrics;<br>Cardiometabolic<br>biomarkers                                                                                                                      | Medical records              | 94  |
| <b>Wroblewska-Seniuk 2009</b> <sup>91</sup>                                                                                                                                                                                                                                          | Poland  | Clinical Hospital of Obstetrics and Gynecology, Poznan | Perinatal/postpartum                                                                                     | Anthropometrics;<br>Glycemic traits                                                                                                                                    | Not specified                | 34  |
| <b>Boerschmann 2010</b> <sup>57</sup>                                                                                                                                                                                                                                                | Germany | German GDM Offspring Study, Births 1989-2000           | Perinatal/postpartum                                                                                     | Anthropometrics;<br>Glycemic traits                                                                                                                                    | Medical records              | 232 |
| <b>Shokry 2019</b> <sup>85</sup>                                                                                                                                                                                                                                                     | Spain   | PREOBE Study (NCT01634464; 2008-2012)                  | Perinatal/postpartum                                                                                     | Anthropometrics; Novel 'omics; Other: The novel 'omics is cord blood metabolomics                                                                                      | Not specified                | 27  |
| <b>Zhu 2016</b> <sup>96</sup> , <b>Zhu 2017</b> <sup>97</sup> , <b>Zhu 2017</b> <sup>98</sup> , <b>Maslova 2019</b> <sup>78</sup> , <b>Maslova 2018</b> <sup>77</sup> , <b>Maslova 2017</b> <sup>76</sup> , <b>Kampmann 2019</b> <sup>99</sup> , <b>Kampmann 2019</b> <sup>100</sup> | Denmark | Danish National Birth Cohort (DNBC)                    | Perinatal/Postpartum;<br>Offspring Life-Course                                                           | Anthropometrics;<br>Glycemic traits;<br>Cardiometabolic<br>biomarkers                                                                                                  | Self-report; Medical records | 918 |
| <b>Wilk 2015</b> <sup>105</sup>                                                                                                                                                                                                                                                      | Poland  | Pomeranian Medical University, Szczecin (NR)           | Offspring life-course                                                                                    | Glycemic traits                                                                                                                                                        | Not specified                | 50  |
| <b>MATERNAL AND OFFSPRING OUTCOMES</b>                                                                                                                                                                                                                                               |         |                                                        |                                                                                                          |                                                                                                                                                                        |                              |     |
| <b>Lauenborg 2004</b> <sup>32</sup>                                                                                                                                                                                                                                                  | Denmark | Rigshospitalet, Denmark (1978-1985, 1987-1996)         | Social/environmental/genetic;<br>Perinatal/postpartum;<br>Maternal life-course;<br>Offspring life-course | Maternal: T2D;<br>Offspring:<br>Anthropometrics;<br>Glycemic traits; Other:<br>GLP-1, GIP, Glucagon;<br>Glycemic traits; Novel<br>'omics; T2D;<br>Metabolomic syndrome | Not specified                |     |
| <b>DelGobbo 2012</b> <sup>104</sup>                                                                                                                                                                                                                                                  | Canada  | Royal Victoria Hospital (1989-1991)                    | Perinatal/postpartum;<br>Maternal life-course                                                            | Maternal: T2D;<br>Offspring:<br>Anthropometrics;<br>Glycemic traits;<br>Cardiometabolic<br>biomarkers                                                                  | Not specified                |     |

|                                                                                                                 |         |                                                                                      |                                                                                |                                                                                                                               |                  |                                 |
|-----------------------------------------------------------------------------------------------------------------|---------|--------------------------------------------------------------------------------------|--------------------------------------------------------------------------------|-------------------------------------------------------------------------------------------------------------------------------|------------------|---------------------------------|
| <b>Vääräsmäki 2009<sup>122</sup>, Pirkola 2010<sup>80</sup>, Pirkola 2010<sup>25</sup></b>                      | Finland | Northern Finland Birth Cohort of 1986                                                | Perinatal/postpartum                                                           | Maternal: T2D<br>Offspring:<br>Anthropometrics;<br>Glycemic traits;<br>Cardiometabolic<br>biomarkers; Metabolomic<br>syndrome | Biochemical test | Maternal: 139<br>Offspring: 95  |
| <b>Gunderson 2015<sup>35</sup>, Lai 2020<sup>36</sup>, Faith 2019<sup>62</sup>, Gunderson 2018<sup>64</sup></b> | USA     | Study of Women, Infant Feeding and Type 2 Diabetes after GDM Pregnancy (SWIFT) Study | Social/environmental/genetic;<br>Perinatal/postpartum;<br>Maternal life-course | Maternal: T2D<br>Offspring:<br>Anthropometrics                                                                                | Medical records  | Maternal: 959<br>Offspring: 464 |

**Abbreviations:** BMI – body mass index; CRP – C-reactive protein; CVD – cardiovascular disease; GDM – gestational diabetes mellitus; GLP – glucagon-like peptide; n.s. - not significant; SES – socioeconomic status; T2D – type 2 diabetes.

**TABLE 2.** Observational studies evaluating prognostic factors associated with incident T2D among women with a history of GDM (*n*=51).

| Author Year                 | Trial/ Cohort/ Registry                                                                                                                                      | Exposures and associations with incident T2D |      |                     |                                       |
|-----------------------------|--------------------------------------------------------------------------------------------------------------------------------------------------------------|----------------------------------------------|------|---------------------|---------------------------------------|
|                             |                                                                                                                                                              | Perinatal/ Postpartum                        |      | Maternal Lifecourse | Social/ Environment/<br>Genetic       |
| Kaul 2015 <sup>54</sup>     | Alberta Perinatal Health Program & Alberta Ministry of Health                                                                                                | Pre-pregnancy BMI                            | ↑    |                     |                                       |
| Gunderson 2018 <sup>2</sup> | Coronary Artery Risk Development in Young Adults (CARDIA)                                                                                                    | Breastfeeding                                | ↓    |                     |                                       |
| Vince 2018 <sup>3</sup>     | CroDiab registry                                                                                                                                             | Pre-pregnancy BMI                            | ↑    |                     | Education n.s.<br>Marital Status n.s. |
| Varner 2017 <sup>4</sup>    | Eunice Kennedy Shriver National Institute of Child Health and Human Development Maternal-Fetal Medicine Units (MFMU) Network randomized clinical trial (RCT) | Parity                                       | ↑    |                     |                                       |
| Li 2019 <sup>5</sup>        | Follow up of Tianjin Gestational Diabetes Mellitus Prevention Program                                                                                        | Pre-pregnancy BMI                            | ↑    |                     | Family history of T2D ↑               |
|                             |                                                                                                                                                              | Pregnancy Complication                       | ↑    |                     |                                       |
|                             |                                                                                                                                                              | GDM severity                                 | ↑    |                     |                                       |
|                             |                                                                                                                                                              | Age at Pregnancy                             | n.s. |                     |                                       |
| Liu 2014 <sup>6</sup>       | Follow up of Tianjin Gestational Diabetes Mellitus Prevention Program                                                                                        | Pre-pregnancy BMI                            | ↑    | Weight Gain ↑       |                                       |
| Liu 2016 <sup>119</sup>     | Follow up of Tianjin Gestational Diabetes Mellitus Prevention Program                                                                                        | GDM severity                                 | ↑    |                     |                                       |

|                               |                                                              |                                                                                                                                                         |      |                                  |                                   |                          |   |
|-------------------------------|--------------------------------------------------------------|---------------------------------------------------------------------------------------------------------------------------------------------------------|------|----------------------------------|-----------------------------------|--------------------------|---|
| Li 2014 <sup>7</sup>          | Follow up of Tianjin Gestational Diabetes Prevention Program |                                                                                                                                                         | BMI  | ↑                                |                                   |                          |   |
| Steinhart 1997 <sup>8</sup>   | Indian Health Service                                        | Parity                                                                                                                                                  | ↑    | BMI                              | ↑                                 |                          |   |
|                               |                                                              | GDM severity                                                                                                                                            | ↑    |                                  |                                   |                          |   |
|                               |                                                              | Maternal age                                                                                                                                            | ↑    |                                  |                                   |                          |   |
|                               |                                                              | Offspring birthweight                                                                                                                                   | ↑    |                                  |                                   |                          |   |
| Hakkarainen 2018 <sup>9</sup> | Kuopio University Hospital                                   | Offspring birthweight                                                                                                                                   | ↑    |                                  |                                   |                          |   |
| Wang 2012 <sup>10</sup>       | Louisiana State University Hospital-Based Longitudinal Study |                                                                                                                                                         |      |                                  | Race (African American vs. White) | n.s.                     |   |
| Chodick 2010 <sup>11</sup>    | Maccabi Healthcare Services (MHS)                            | Parity (≥4 vs. 1)                                                                                                                                       | ↑    | BMI                              | ↑                                 | SES (lowest vs. highest) | ↑ |
|                               |                                                              | GDM severity                                                                                                                                            | ↑    | Smoking (current/past vs. never) | n.s.                              |                          |   |
| Lappas 2015 <sup>12</sup>     | Mercy Health                                                 | Novel biomarkers (cholesterol ester species CE 20:4, the alkenylphosphatidylethanolamine species PE(P-36:2) and the phosphatidylserine species PS 38:4) | ↑    |                                  |                                   |                          |   |
| Lee 2007 <sup>13</sup>        | Mercy Hospital for Women in Melbourne, Australia             | GDM severity                                                                                                                                            | ↑    |                                  |                                   | Race (Asian vs. White)   | ↑ |
|                               |                                                              | Offspring birthweight                                                                                                                                   | ↑    |                                  |                                   |                          |   |
| Retnakaran 2015 <sup>14</sup> | Ministry of Health and Long-Term Care of Ontario             | Offspring sex (Girl vs Boy)                                                                                                                             | ↑    |                                  |                                   |                          |   |
| Kawasaki 2020 <sup>15</sup>   | n/a                                                          | Pre-pregnancy BMI                                                                                                                                       | ↑    |                                  |                                   |                          |   |
|                               |                                                              | GDM severity                                                                                                                                            | ↑    |                                  |                                   |                          |   |
| Lin 2016 <sup>16</sup>        | n/a                                                          | Pre-pregnancy BMI                                                                                                                                       | ↑    |                                  |                                   |                          |   |
|                               |                                                              | GDM severity                                                                                                                                            | ↑    |                                  |                                   |                          |   |
|                               |                                                              | Offspring birthweight                                                                                                                                   | n.s. |                                  |                                   |                          |   |
|                               |                                                              | Pregnancy complication                                                                                                                                  | n.s. |                                  |                                   |                          |   |

|                              |                                                                                                          |                        |      |                                             |      |
|------------------------------|----------------------------------------------------------------------------------------------------------|------------------------|------|---------------------------------------------|------|
| Rivero 2008 <sup>17</sup>    | N/A                                                                                                      | Pre-pregnancy BMI      | ↑    | BMI                                         | ↑    |
|                              |                                                                                                          |                        |      | Blood Pressure                              | ↑    |
|                              |                                                                                                          |                        |      | Lipids                                      | ↑    |
|                              |                                                                                                          |                        |      | Clinical Markers (CRP)                      | ↑    |
| Akinci 2011 <sup>18</sup>    | N/A                                                                                                      | GDM severity           | ↑    |                                             |      |
|                              |                                                                                                          | Pre-pregnancy BMI      | n.s. |                                             |      |
| Myers 2014 <sup>19</sup>     | N/A                                                                                                      |                        |      | Race (Asian vs. White)                      | ↑    |
| Pintaudi 2015 <sup>20</sup>  | N/A                                                                                                      | Pregnancy complication | ↑    |                                             |      |
| Eades 2015 <sup>21</sup>     | N/A                                                                                                      | Pregnancy BMI          | ↑    |                                             |      |
|                              |                                                                                                          | GDM severity           | ↑    |                                             |      |
| Kugishima 2018 <sup>22</sup> | National Hospital Organization Nagasaki Medical Center, Omura, Japan                                     | GDM severity           | ↑    |                                             |      |
| Tseng 2008 <sup>23</sup>     | National Taiwan University College of Medicine                                                           |                        |      | Family history of T2D                       | n.s. |
| Bao 2015 <sup>24</sup>       | NHS II, Diabetes & Women's Health Study                                                                  | Weight gain            | ↑    | BMI                                         | ↑    |
|                              |                                                                                                          | Pregnancy BMI          | ↑    |                                             |      |
| Pirkola 2010 <sup>25</sup>   | Northern Finland Birth Cohort of 1986                                                                    | Pre-pregnancy BMI      | ↑    |                                             |      |
| Ley 2020 <sup>26</sup>       | Nurses' Health Study (NHS) II and Diabetes in Women's Health (DWH) Study                                 | Breastfeeding          | ↓    |                                             |      |
| Tobias 2012 <sup>27</sup>    | Nurse's Health Study II                                                                                  |                        |      | Diet                                        | ↓    |
| Tobias 2018 <sup>28</sup>    | Nurse's Health Study II                                                                                  |                        |      | Novel biomarker (Branched chain amino acid) | ↑    |
| Bao 2014 <sup>29</sup>       | Nurses' Health Study II who had a history of GDM, as part of the ongoing Diabetes & Women's Health Study |                        |      | Physical activity                           | ↓    |



|                                  |                                                                                                          |                                                                                                              |                                             |                              |                                                 |
|----------------------------------|----------------------------------------------------------------------------------------------------------|--------------------------------------------------------------------------------------------------------------|---------------------------------------------|------------------------------|-------------------------------------------------|
| Bao 2016 <sup>30</sup>           | Nurses' Health Study II who had a history of GDM, as part of the ongoing Diabetes & Women's Health Study |                                                                                                              | Diet (high protein/ fat from animal source) | ↑                            |                                                 |
|                                  |                                                                                                          |                                                                                                              | Diet (plant protein)                        | n.s.                         |                                                 |
| Huvinen 2018 <sup>31</sup>       | RADIEL                                                                                                   | Pre-pregnancy BMI                                                                                            | ↑                                           |                              |                                                 |
| Lauenborg 2004 <sup>32</sup>     | Rigshospitalet Old Cohort, Rigshospitalet New Cohort                                                     | Pre-pregnancy BMI                                                                                            | ↑                                           |                              |                                                 |
|                                  |                                                                                                          | GDM severity                                                                                                 | ↑                                           | Family history of T2D        | ↑                                               |
|                                  |                                                                                                          | Pregnancy complication                                                                                       | n.s.                                        | Race (Nordic vs. non-Nordic) | n.s.                                            |
| Schaefer-Graf 2009 <sup>33</sup> | N/A                                                                                                      | Novel biomarker (risk score: composite of pre-pregnancy BMI, gestational age at diagnosis, and GDM severity) | ↑                                           |                              |                                                 |
| Linné 2002 <sup>34</sup>         | Stockholm Pregnancy and Women's Nutrition (SPAWN) study                                                  | Pre-pregnancy BMI                                                                                            | n.s.                                        | BMI                          | ↑                                               |
|                                  |                                                                                                          | Parity                                                                                                       | n.s.                                        | Clinical Biomarkers          | n.s.                                            |
| Gunderson 2015 <sup>35</sup>     | SWIFT Cohort                                                                                             | Breastfeeding                                                                                                | ↓                                           |                              |                                                 |
| Lai 2020 <sup>36</sup>           | SWIFT Cohort                                                                                             |                                                                                                              | Metabolomic profile                         | ↑                            |                                                 |
| Wahlberg 2016 <sup>37</sup>      | Swedish Medical Birth Registry (SMBR) in 1902                                                            | GDM severity                                                                                                 | ↑                                           |                              | Race (non-European vs. European)                |
|                                  |                                                                                                          | Pre-pregnancy BMI                                                                                            | ↑                                           |                              |                                                 |
| Lobner 2006 <sup>38</sup>        | The German GDM Prospective Study                                                                         | Pre-pregnancy BMI                                                                                            | ↑                                           |                              |                                                 |
|                                  |                                                                                                          | Parity                                                                                                       | ↑                                           |                              |                                                 |
|                                  |                                                                                                          | GDM severity                                                                                                 | ↑                                           |                              |                                                 |
|                                  |                                                                                                          | Novel biomarker (auto-antibodies to GAD and/or IA2)                                                          | ↑                                           |                              |                                                 |
| Daly 2018 <sup>39</sup>          | The Health Improvement Network (THIN) database                                                           |                                                                                                              |                                             |                              | Race (Afro-Caribbean and South Asian vs. other) |

|                              |                                                          |                                          |      |                                              |      |
|------------------------------|----------------------------------------------------------|------------------------------------------|------|----------------------------------------------|------|
| Tam 2012 <sup>40</sup>       | N/A                                                      | Pregnancy BMI                            | ↑    | Hypertension                                 | ↑    |
|                              |                                                          |                                          |      | Clinical markers (lipids and glycemic tests) | n.s. |
| Fan 2019 <sup>41</sup>       | Tianjin GDM Screening Project                            | Pre-pregnancy BMI                        | ↑    |                                              |      |
|                              |                                                          | Postpartum BMI                           | ↑    |                                              |      |
| Shen 2019 <sup>42</sup>      | Tianjin GDM Screening Project                            | Breastfeeding                            | ↓    |                                              |      |
| Wang 2014 <sup>43</sup>      | Tianjin Gestational Diabetes Mellitus Prevention Program |                                          |      | BMI                                          | ↑    |
| Yin 2017 <sup>44</sup>       | Tianjin Gestational Diabetes Mellitus Prevention Program |                                          |      | Clinical biomarkers                          | ↑    |
| Yuan 2016 <sup>45</sup>      | Tianjin Gestational Diabetes Mellitus Prevention Program | Pregnancy complications                  | ↑    | Chronic hypertension                         | ↑    |
| Gobl 2014 <sup>46</sup>      | Vienna Post-Gestational Diabetes Project                 |                                          |      | Novel biomarker (sICAM and sE-selectin)      | ↑    |
| Yefet 2019 <sup>47</sup>     | N/A                                                      | GDM severity                             | ↑    |                                              |      |
| Weerasiri 1993 <sup>48</sup> | N/A                                                      | Novel biomarker (amniotic fluid insulin) | ↑    |                                              |      |
| Hanson 1996 <sup>49</sup>    | N/A                                                      |                                          |      | Novel biomarker (Proinsulin:Insulin)         | n.s. |
| Pallardo 1999 <sup>50</sup>  | N/A                                                      | Pre-pregnancy BMI                        | ↑    |                                              |      |
|                              |                                                          | GDM severity                             | ↑    |                                              |      |
|                              |                                                          | Parity                                   | n.s. |                                              |      |
|                              |                                                          | Previous pregnancy complications         | n.s. |                                              |      |
|                              |                                                          | Offspring birthweight                    | n.s. |                                              |      |

**Abbreviations:** BMI – body mass index; CRP – C-reactive protein; CVD – cardiovascular disease; GDM – gestational diabetes mellitus; n.s. - not significant; SES – socioeconomic status; T2D – type 2 diabetes.

**TABLE 3.** Randomized controlled trials (RCT) evaluating prognostic factors associated with incident type 2 diabetes (T2D) among women with a history of GDM ( $n=3$ ).

| <b>Author Year</b>         | <b>Trial/ Cohort/ Registry</b>                                                                                                                                                   | <b>Intervention/exposure and association with T2D</b>                                      |      |
|----------------------------|----------------------------------------------------------------------------------------------------------------------------------------------------------------------------------|--------------------------------------------------------------------------------------------|------|
| Casey 2020 <sup>107</sup>  | Eunice Kennedy Shriver National Institute of Child Health and Human Development Maternal-Fetal Medicine Units (MFMU) Network’s multicenter randomized controlled treatment trial | Diet (formal nutritional counseling and diet therapy with insulin vs. usual prenatal care) | n.s. |
| Huang 2021 <sup>108</sup>  | N/A                                                                                                                                                                              | GDM severity                                                                               | ↑    |
|                            |                                                                                                                                                                                  | Mobile management                                                                          | n.s. |
| Ratner 2008 <sup>109</sup> | Diabetes Prevention Program (DPP)                                                                                                                                                | Intensive lifestyle + Metformin                                                            | ↑    |

**Abbreviations:** GDM – gestational diabetes mellitus; n.s. - not significant

**TABLE 4.** Observational studies evaluating prognostic factors associated with cardiovascular disease (CVD) among women with a history of GDM ( $n=6$ ).

| Author (year)               | Trial/ Cohort/<br>Registry                                          | Exposures and associations with CVD                  |                                                                |                                 |
|-----------------------------|---------------------------------------------------------------------|------------------------------------------------------|----------------------------------------------------------------|---------------------------------|
|                             |                                                                     | Perinatal/ Postpartum                                | Maternal Lifecourse                                            | Social/ Environment/<br>Genetic |
| Dehmer 2018* <sup>51</sup>  | The Coronary Artery Risk Development in Young Adults (CARDIA) Study |                                                      |                                                                | Race (Black vs. White) ↑        |
| Tobias 2017 <sup>52</sup>   | Nurses' Health Study II (NHS II)                                    | Pre-pregnancy BMI ↑                                  | Healthy Lifestyle Score <sup>‡</sup> ↓<br>Diagnosed with T2D ↑ | Family history of CVD n.s.      |
| Fadl 2014 <sup>53</sup>     | Swedish Medical Birth Register (SMBR)                               | Pregnancy BMI ↑                                      | Smoking ↑<br>Chronic hypertension n.s.                         |                                 |
| Pintaudi 2015 <sup>20</sup> | N/A                                                                 | Pregnancy complications ↑                            |                                                                |                                 |
| Kaul 2015 <sup>54</sup>     | Alberta Perinatal Health Program & Alberta Ministry of Health       |                                                      | BMI ↑                                                          |                                 |
| Pace 2017 <sup>55</sup>     | N/A                                                                 | Pregnancy Complications (gestational hypertension) ↑ |                                                                |                                 |

**Abbreviations:** BMI – body mass index; CVD – cardiovascular disease; GDM – gestational diabetes mellitus; n.s. - not significant; T2D – type 2 diabetes.

\*Association with chronic kidney disease (CKD) outcome

<sup>‡</sup> Healthy lifestyle score included a combination of diet, BMI, physical activity, and smoking.

**TABLE 5.** Observational studies evaluating prognostic factors in relation to anthropometric outcomes among offspring exposed to GDM *in utero* (n=43).

| Author Year                    | Trial/Cohort/Registry Name                                | Age of outcome assessment | Exposure      |             |                   | Association |
|--------------------------------|-----------------------------------------------------------|---------------------------|---------------|-------------|-------------------|-------------|
|                                |                                                           |                           | Maternal      | Offspring   | Offspring Outcome |             |
| Aris 2017 <sup>56</sup>        | Growing up today in Singapore (GUSTO) study               | 24-36 months              | Breastfeeding |             | Weight            | n.s.        |
|                                |                                                           |                           |               |             | BMI               | n.s.        |
| Boerschmann 2010 <sup>57</sup> |                                                           | 11 years                  |               |             | Weight            | ↑           |
|                                |                                                           |                           |               |             | Weight            | ↑           |
|                                |                                                           |                           |               |             | Birthweight       | Weight      |
| Chen 2020 <sup>58</sup>        | Medical Birth Registry of Xiamen                          | 1-5 years                 |               | Birthweight | BMI               | ↑           |
|                                |                                                           |                           |               |             | Weight            | n.s.        |
| Crume 2012 <sup>59</sup>       | Exploring Perinatal outcomes Among CHildren (EPOCH) study | 2-13 years                | Breastfeeding |             | BMI               | ↓           |
| Dugas 2018 <sup>60</sup>       |                                                           | 2-14 years                | Breastfeeding |             | Weight            | n.s.        |

|                              |                                                                                                                                                                                                                |            |                             |                     |            |      |
|------------------------------|----------------------------------------------------------------------------------------------------------------------------------------------------------------------------------------------------------------|------------|-----------------------------|---------------------|------------|------|
|                              |                                                                                                                                                                                                                |            |                             | Waist Circumference | n.s.       |      |
|                              |                                                                                                                                                                                                                |            |                             | Fat Mass            | n.s.       |      |
|                              |                                                                                                                                                                                                                |            |                             | Lean Fat Mass       | n.s.       |      |
| Egeland 2010 <sup>61</sup>   | N/A                                                                                                                                                                                                            | 15 years   | GDM Severity                | BMI                 | n.s.       |      |
|                              |                                                                                                                                                                                                                |            |                             | Body fat            | n.s.       |      |
| Faith 2019 <sup>62</sup>     | SWIFT Cohort                                                                                                                                                                                                   | 2-5 years  | Breastfeeding               | Obesity             | ↓          |      |
| Gillman 2003 <sup>63</sup>   | Growing Up Today Study and Nurses' Health Study II                                                                                                                                                             | 9-14 years |                             | Birthweight         | Overweight | n.s. |
| Gunderson 2018 <sup>64</sup> | SWIFT Offspring Study                                                                                                                                                                                          | 12 months  | Breastfeeding (vs. Formula) | Weight              | ↑          |      |
| Hammoud 2017 <sup>65</sup>   | University Medical Center Utrecht Women with a pregnancy complicated by type 1, type 2, or gestational diabetes who delivered in the University Medical Center Utrecht, the Netherlands, between 2000 and 2006 | 4-6 years  |                             | Birthweight         | BMI        | ↑    |
| Hammoud 2018 <sup>66</sup>   |                                                                                                                                                                                                                | 1-14 years |                             | Birthweight         | BMI        | n.s. |

|                             |                                                                                                                                     |             |                                            |               |                  |      |
|-----------------------------|-------------------------------------------------------------------------------------------------------------------------------------|-------------|--------------------------------------------|---------------|------------------|------|
| Huang 2020 <sup>67</sup>    | SIPS                                                                                                                                | 5 years     | Pregnancy Complications                    |               | BMI              | ↑    |
| Hui 2018 <sup>68</sup>      | Children of 1997                                                                                                                    | 16 years    | Breastfeeding                              |               | Obesity          | n.s. |
| Ijäs 2015 <sup>69</sup>     | Follow-up of RCT of GDM requiring pharmacological treatment at Oulu University Hospital and secondary-level Kainuu Central Hospital | 18 months   | GDM Severity                               |               | Weight           | ↑    |
| Kaul 2019 <sup>70</sup>     | Calgary Zone                                                                                                                        | 4-6 years   | Breastfeeding                              | LGA           | Obesity          | ↓    |
|                             |                                                                                                                                     |             | Breastfeeding                              | Normal Weight | Obesity          | n.s. |
| Kelstrup 2016 <sup>71</sup> | N/A                                                                                                                                 | 27-34 years | Gene Expression (Adipose Tissue: PPARGC1A) |               | Body fat         | ↓    |
|                             |                                                                                                                                     |             |                                            |               | BMI              | ↓    |
| Kubo 2014 <sup>72</sup>     | Cohort Study of Young Girls' Nutrition, Environment, and Transitions (CYGNET)                                                       | 10-12 years | Pre-pregnancy BMI                          |               | BMI              | ↑    |
|                             |                                                                                                                                     |             |                                            |               | Percent Body Fat | ↑    |
|                             |                                                                                                                                     |             |                                            |               | Waist:Hip        | ↑    |

|                            |                                                                       |                     |                                                   |                     |      |
|----------------------------|-----------------------------------------------------------------------|---------------------|---------------------------------------------------|---------------------|------|
| Landi 2019 <sup>73</sup>   | N/A                                                                   | 5 years             | GDM Severity                                      | Weight              | n.s. |
| Leng 2015 <sup>74</sup>    | Tianjin Gestational Diabetes Mellitus Prevention Program              | 1-5 years           | Pre-pregnancy BMI & Gestational BMI               | BMI                 | ↑    |
|                            |                                                                       |                     |                                                   | Weight              | ↑    |
| Liang 2020 <sup>75</sup>   | Follow up of Tianjin Gestational Diabetes Mellitus Prevention Program | 6 years             | BMI Genetic Risk Score                            | BMI                 | ↑    |
|                            |                                                                       |                     |                                                   | Waist Circumference | ↑    |
|                            |                                                                       |                     |                                                   | Fat Mass            | ↑    |
| Maslova 2017 <sup>76</sup> | Danish National Birth Cohort                                          | 9-12 years          | Diet (Protein Intake)                             | Abdominal Fat       | n.s. |
|                            |                                                                       |                     |                                                   | Total Fat           | n.s. |
| Maslova 2018 <sup>77</sup> | Danish National Birth Cohort                                          | 9-16 years          | Diet (fatty fish intake)                          | BMI                 | ↑    |
|                            |                                                                       |                     |                                                   | Waist Circumference | ↑    |
| Maslova 2019 <sup>78</sup> | Danish National Birth Cohort (DNBC)                                   | 12 months - 7 years | Pregnancy Diet (Glycemic index and glycemic load) | Fat Mass            | n.s. |



|                                  |                                                                         |           |                                    |               |      |
|----------------------------------|-------------------------------------------------------------------------|-----------|------------------------------------|---------------|------|
|                                  |                                                                         |           |                                    | BMI           | n.s. |
| Nouhjah 2019 <sup>79</sup>       | Ahvazin children born between 2014 and 2016 were enrolled in this study | 2 years   | Sex (Boy vs Girl)                  | BMI           | ↑    |
|                                  |                                                                         |           |                                    | Weight        | n.s. |
| Pirkola 2010 <sup>80</sup>       | Northern Finland Birth Cohort of 1986                                   | 16 years  | Pre-pregnancy BMI                  | Weight        | ↑    |
|                                  |                                                                         |           |                                    | Abdominal Fat | ↑    |
| Schaefer-Graf 2005 <sup>81</sup> |                                                                         | 2-8 years | Pre-pregnancy BMI and GDM severity | BMI           | n.s. |
|                                  |                                                                         |           | Lifecourse BMI                     | BMI           | ↑    |
|                                  |                                                                         |           | Neonatal BMI                       | BMI           | ↑    |
|                                  |                                                                         |           | Abdominal circumference            | BMI           | n.s. |
| Schaefer-Graf 2006 <sup>82</sup> |                                                                         | 2-8 years | Breastfeeding                      | Weight        | ↓    |
|                                  |                                                                         |           | Breastfeeding + BMI                | Weight        | ↓    |
| Shi 2020 <sup>83</sup>           | Medical Birth Registry of Xiamen                                        | 1-4 years | GDM Severity                       | BMI           | n.s. |

|                                      |                                                           |           |                        | Weight              | n.s. |
|--------------------------------------|-----------------------------------------------------------|-----------|------------------------|---------------------|------|
| Shearrer 2015 <sup>84</sup>          | Women, Infants and Children Program in Los Angeles County | 2-4 years | Breastfeeding          | BMI                 | ↓    |
| Shokry 2019 <sup>85</sup>            | PREOBE study                                              | 1 year    | Cord blood biomarkers  | BMI                 | ↑    |
| Shub 2019 <sup>86</sup>              |                                                           | 1 year    | Leptin and Adiponectin | Weight              | n.s. |
| Song 2021 <sup>87</sup>              | Tianjin Gestational Diabetes Mellitus Prevention Program  | 6 years   | Genetic Risk Score     | Weight              | n.s. |
| Vandyousefi 2019 <sup>88</sup>       | 2014 Los Angeles County WIC Survey                        | 1-5 years | Breastfeeding          | BMI                 | ↓    |
| Vohr 1997 <sup>89</sup>              | N/A                                                       | 1 year    | Birthweight            | BMI                 | ↑    |
|                                      |                                                           |           |                        | Waist Circumference | ↑    |
|                                      |                                                           |           |                        | Skinfold            | ↑    |
| Vohr 1999 <sup>90</sup>              | N/A                                                       | 4-7 years | Birthweight            | BMI                 | ↑    |
|                                      |                                                           |           |                        | Waist Circumference | n.s. |
|                                      |                                                           |           |                        | Skinfold            | ↑    |
| Wroblewska-Seniuk 2009 <sup>91</sup> | N/A                                                       | 4-9 years | GDM Severity           | BMI                 | n.s. |

|                          |                                                          |            |                                 | Waist Circumference | n.s. |      |
|--------------------------|----------------------------------------------------------|------------|---------------------------------|---------------------|------|------|
| Zhang 2015 <sup>92</sup> | Tianjin Gestational Diabetes Mellitus Prevention Program | 1-5 years  | GDM Severity                    | BMI                 | ↑    |      |
| Zhang 2017 <sup>93</sup> | Tianjin Gestational Diabetes Mellitus Prevention Program | 1-5 years  | Pregnancy Complications         | BMI                 | ↑    |      |
| Zhang 2017 <sup>94</sup> | Tianjin Gestational Diabetes Mellitus Prevention Program | 1-5 years  | Physical Activity (TV watching) |                     | ↑    |      |
| Zhao 2015 <sup>95</sup>  |                                                          | 5-10 years | Breastfeeding                   | Weight              | BMI  | ↓    |
|                          |                                                          |            |                                 | Sex (Female)        | BMI  | ↓    |
|                          |                                                          |            |                                 | Weight              | BMI  | n.s. |
| Zhu 2016 <sup>96</sup>   | Danish National Birth Cohort (DNBC)                      | 7 years    | GDM Severity                    | BMI                 | ↑    |      |
| Zhu 2017 <sup>97</sup>   | Danish National Birth Cohort (DNBC)                      | 7 years    | Diet (Sugar-sweetened beverage) | BMI                 | ↑    |      |
| Zhu 2017 <sup>98</sup>   | Danish National Birth Cohort (DNBC)                      | 7 years    | Diet (refined grain)            | BMI                 | ↑    |      |

**TABLE 6.** Randomized control trials evaluating prognostic factors associated with anthropometric outcomes among offspring exposed to GDM *in utero* ( $n=4$ ).

| Author Year                 | Trial Name                                                                                                                                                   | Intervention and/or Exposure                                                               | Offspring Outcome   | Association |
|-----------------------------|--------------------------------------------------------------------------------------------------------------------------------------------------------------|--------------------------------------------------------------------------------------------|---------------------|-------------|
| Rowan 2011 <sup>115</sup>   | Metformin in Gestational diabetes (MiG): the offspring follow-up (TOFU)                                                                                      | Treatment (Metformin vs Insulin)                                                           | Skinfold            | ↑           |
|                             |                                                                                                                                                              |                                                                                            | Waist circumference | n.s.        |
|                             |                                                                                                                                                              |                                                                                            | Total fat           | n.s.        |
| Gillman 2010 <sup>116</sup> | Australian Carbohydrate Intolerance Study in Pregnant Women (ACHOIS)                                                                                         | Treatment (dietary advice, blood glucose monitoring, and insulin therapy) vs. Routine Care | BMI                 | n.s.        |
| Landon 2015 <sup>110</sup>  | Eunice Kennedy Shriver National Institute of Child Health and Human Development Maternal-Fetal Medicine Units (MFMU) Network randomized clinical trial (RCT) | Treatment (dietary advice, blood glucose monitoring, and insulin therapy) vs. Routine Care | BMI                 | n.s.        |
|                             |                                                                                                                                                              |                                                                                            | Waist circumference | n.s.        |
| Malcolm 2006 <sup>113</sup> | N/A                                                                                                                                                          | Tight vs minimal intervention                                                              | Weight              | n.s.        |

**TABLE 7.** Observational studies evaluating prognostic factors in relation to cardiometabolic outcomes among offspring exposed to GDM *in utero* (n=14).

| Author Year                 | Trial/Cohort/Registry Name          | Exposure                                          |             | Offspring Outcome | Association |
|-----------------------------|-------------------------------------|---------------------------------------------------|-------------|-------------------|-------------|
|                             |                                     | Maternal                                          | Offspring   |                   |             |
| Maslova 2019 <sup>78</sup>  | Danish National Birth Cohort (DNBC) | Pregnancy Diet (Glycemic index and glycemic load) |             | HOMA-IR           | n.s.        |
|                             |                                     |                                                   |             | MetS              | n.s.        |
| Maslova 2018 <sup>77</sup>  | Danish National Birth Cohort (DNBC) | Diet (only fish intake)                           |             | MetS              | n.s.        |
|                             |                                     |                                                   |             | Lipids            | n.s.        |
|                             |                                     |                                                   |             | HOMA-IR           | n.s.        |
| Kampmann 2019 <sup>99</sup> | Danish National Birth Cohort (DNBC) |                                                   | Birthweight | Fasting glucose   | n.s.        |
|                             |                                     |                                                   |             | Insulin           | n.s.        |
|                             |                                     |                                                   |             | C-peptide         | n.s.        |
|                             |                                     |                                                   |             | HOMA-IR           | n.s.        |

|                                 |                                                                   |                                        |                 |      |
|---------------------------------|-------------------------------------------------------------------|----------------------------------------|-----------------|------|
|                                 |                                                                   |                                        | Lipids          | n.s. |
| Kampmann 2019 <sup>100</sup>    | Danish National Birth Cohort                                      | Pre-pregnancy BMI                      | Leptin          | ↑    |
| Vandyousefi 2019 <sup>101</sup> | SOLAR (Study of Latino Adolescents at Risk for Diabetes)          | Breastfeeding and pre-diabetes         | MetS            | ↓    |
| Dugas 2018 <sup>60</sup>        | Institute of Nutrition and Functional Foods, Laval University     | Breastfeeding                          | Fasting glucose | n.s. |
|                                 |                                                                   |                                        | Fasting insulin | n.s. |
|                                 |                                                                   |                                        | HbA1c           | ↓    |
|                                 |                                                                   |                                        | HOMA-IR         | n.s. |
| Zhang 2017 <sup>94</sup>        | Tianjin Gestational Diabetes Mellitus Prevention Program (TGDMPP) | Physical Activity (sedentary behavior) | Hyperglycemia   | ↑    |
|                                 |                                                                   | Sleeping Time                          | Hyperglycemia   | ↓    |
| Boney 2005 <sup>102</sup>       | Women and their children from Women and Infant's hospital         | Birthweight (LGA)                      | MetS            | ↑    |
| Borgoño 2012 <sup>103</sup>     |                                                                   | Weight Gain (1st year)                 | HOMA-IR         | ↑    |

|                               |                                                               |                                            |                              |      |
|-------------------------------|---------------------------------------------------------------|--------------------------------------------|------------------------------|------|
| Del Gobbo 2012 <sup>104</sup> | N/A                                                           | Diet (Mg)                                  | Fasting glucose (in females) | ↓    |
| Wilk 2015 <sup>105</sup>      | N/A                                                           | Birthweight                                | HOMA-IR                      | ↑    |
| Maslova 2017 <sup>76</sup>    | Danish National Birth Cohort (DNBC)                           | Diet (protein intake)                      | HOMA-IR                      | n.s. |
|                               |                                                               |                                            | Fasting insulin              | ↑    |
| Dugas 2019 <sup>106</sup>     | Institute of Nutrition and Functional Foods, Laval University | Diet (HEI-C)                               | HOMA-IR                      | ↓    |
|                               |                                                               | Overweight                                 | Beta-cell response           | ↑    |
|                               |                                                               |                                            | Triglycerides                | n.s. |
|                               |                                                               |                                            | HDL                          | n.s. |
| Kelstrup 2016 <sup>71</sup>   | N/A                                                           | Gene Expression (Adipose Tissue: PPARGC1A) | HOMA-IR                      | n.s. |
|                               |                                                               | DNA Methylation + BMI                      | HOMA-IR                      | ↑    |

**Abbreviations:** BMI – body mass index; CRP – C-reactive protein; CVD – cardiovascular disease; GDM – gestational diabetes mellitus; HEI - healthy eating index; HDL – high density lipoprotein; HOMA-IR – homeostatic model assessment of insulin resistance; HbA1c – hemoglobin A1c; MetS – metabolic syndrome; n.s. - not significant; T2D – type 2 diabetes.

**TABLE 8.** Randomized control trials evaluating prognostic factors associated with cardiometabolic outcomes among offspring exposed to GDM *in utero* ( $n=7$ ).

| Author Year                    | Trial Name                                                                                                                                                   | Intervention and/or Exposure                                                                           | Offspring Outcome               | Association |
|--------------------------------|--------------------------------------------------------------------------------------------------------------------------------------------------------------|--------------------------------------------------------------------------------------------------------|---------------------------------|-------------|
| Landon 2015 <sup>110</sup>     | Eunice Kennedy Shriver National Institute of Child Health and Human Development Maternal-Fetal Medicine Units (MFMU) Network randomized clinical trial (RCT) | Treatment (dietary intervention, self-monitoring of glucose, and insulin therapy) vs. standard of care | Blood pressure                  | n.s.        |
|                                |                                                                                                                                                              |                                                                                                        | Lipids                          | n.s.        |
|                                |                                                                                                                                                              |                                                                                                        | HOMA-IR                         | n.s.        |
|                                |                                                                                                                                                              |                                                                                                        | Offspring sex (male vs. female) | ↓           |
| Grotenfelt 2020 <sup>111</sup> | Finnish Gestational Diabetes Prevention Study (RADIEL)                                                                                                       | Lifestyle intervention (counseling of exercise and diet)                                               | Metabolic risk profile          | ↑           |
| Keely 2008 <sup>112</sup>      | RCT at the Ottawa Hospital (General and Civic campuses) and the Children's Hospital of Eastern Ontario, in Ottawa, Canada                                    | Treatment (regular check-ups + dietary counseling) vs. Routine Care                                    | Lipids                          | ↑           |
|                                |                                                                                                                                                              |                                                                                                        | HOMA-IR                         | ↑           |
|                                |                                                                                                                                                              |                                                                                                        | Glucose (fasting and 2 hour)    | n.s.        |
| Malcolm 2006 <sup>113</sup>    | RCT at the Ottawa Hospital (General and Civic campuses) and the Children's Hospital of Eastern Ontario, in Ottawa,                                           | Treatment (regular check-ups and were given dietary counseling) vs.                                    | Fasting glucose                 | n.s.        |



|                                      | Canada                                                                            | Routine Care                 |                 |      |
|--------------------------------------|-----------------------------------------------------------------------------------|------------------------------|-----------------|------|
| Wroblewska-Seniuk 2009 <sup>91</sup> | Children born in Clinical Hospital of Obstetrics and Gynecology in Poznan, Poland | Treatment (diet vs. insulin) | Glucose         | n.s. |
|                                      |                                                                                   |                              | Insulin         | n.s. |
|                                      |                                                                                   |                              | HOMA-IR         | n.s. |
|                                      |                                                                                   |                              | HbA1c           | n.s. |
| Egeland 2010 <sup>61</sup>           | N/A                                                                               | Treatment (diet vs. insulin) | Insulin         | ↓    |
|                                      |                                                                                   |                              | Glucose         | ↓    |
|                                      |                                                                                   |                              | Fasting glucose | n.s. |
|                                      |                                                                                   |                              | Lipids          | n.s. |
|                                      |                                                                                   |                              | HOMA-IR         | n.s. |
| Battin 2015 <sup>114</sup>           | MiG Trial                                                                         | Treatment (diet vs. insulin) | Blood pressure  | n.s. |

**Abbreviations:** BMI – body mass index; CRP – C-reactive protein; CVD – cardiovascular disease; GDM – gestational diabetes mellitus; HOMA-IR – homeostatic model assessment of insulin resistance; HbA1c – hemoglobin A1c; : n.s. - not significant; T2D – type 2 diabetes.

**FIGURE 1.** Systematic review screening and attrition diagram.

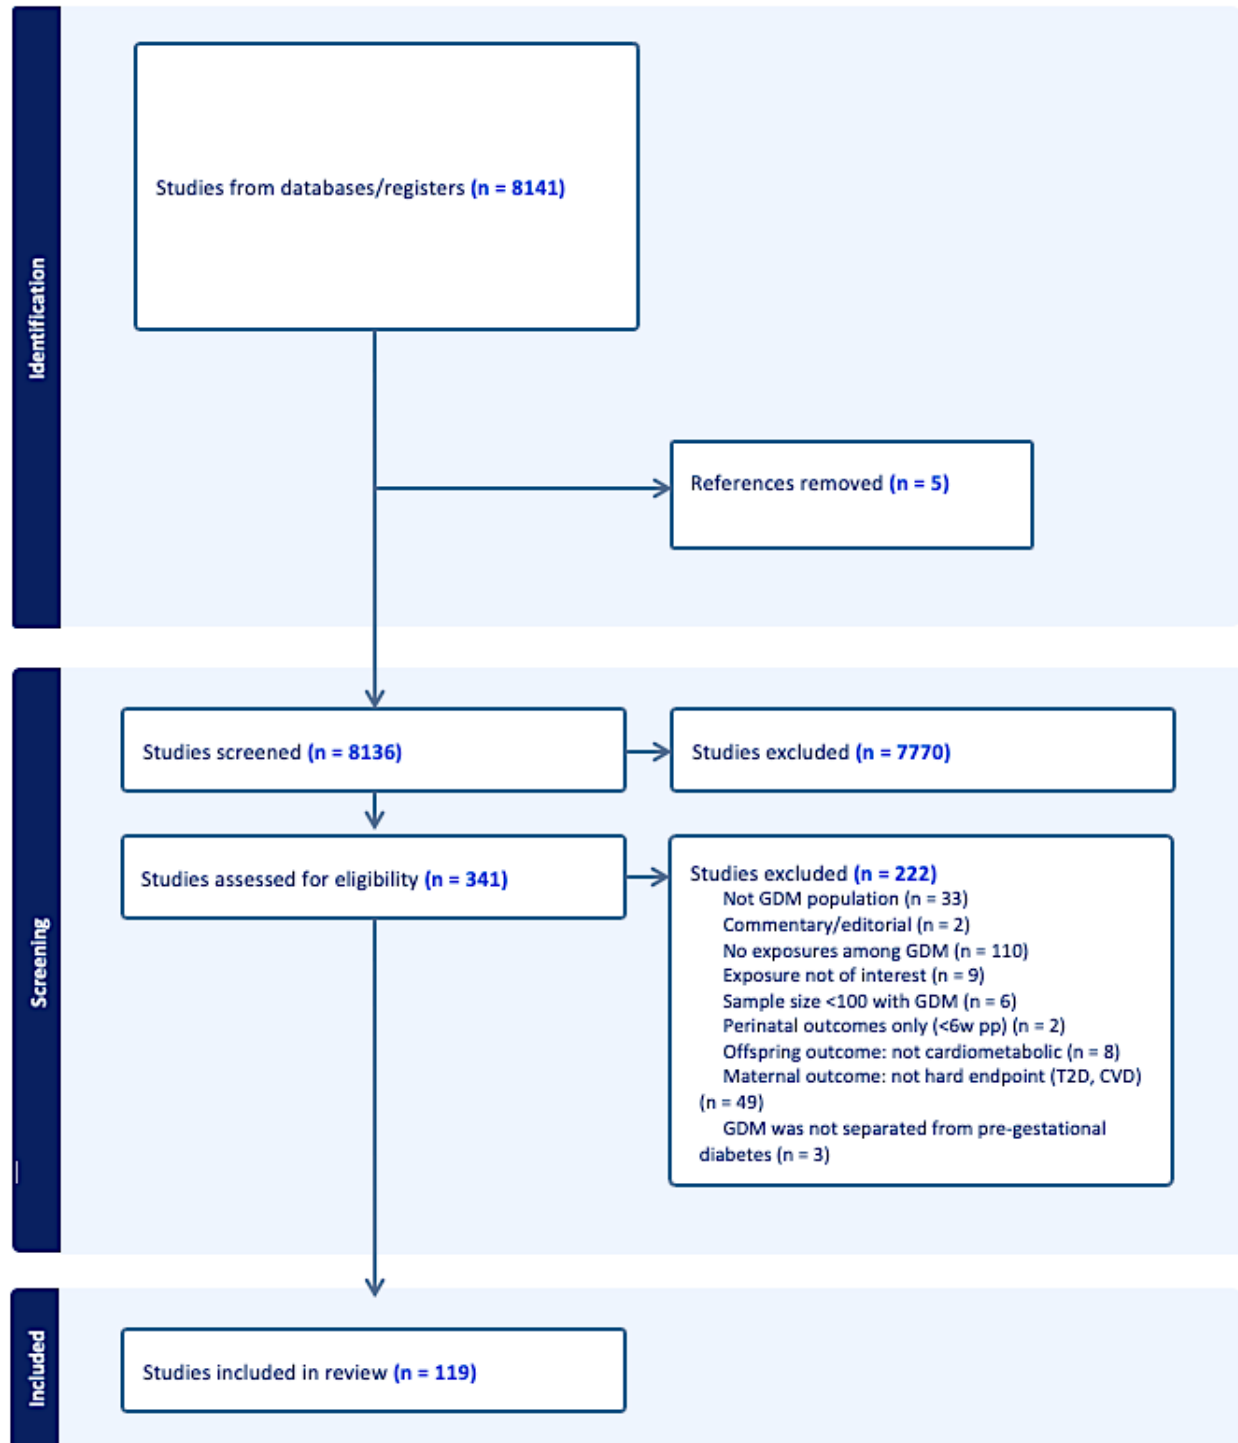

Source: https://medrxiv.org/content/10.1101/2023.04.14.23288199v1.full.pdf
